1 **Title:**

2 **The gene regulatory basis of genetic compensation during neural crest induction**

3 **Authors:**

4 Christopher M. Dooley<sup>1</sup>, Neha Wali<sup>1</sup>, Ian M. Sealy<sup>1</sup>, Richard J. White<sup>1</sup>, Derek L. Stemple<sup>1</sup>,  
5 John E. Collins<sup>1</sup>, Elisabeth M. Busch-Nentwich<sup>1,2\*</sup>

6 <sup>1</sup>Wellcome Sanger Institute, Wellcome Genome Campus, Hinxton, CB10 1SA, UK,

7 <sup>2</sup>Department of Medicine, University of Cambridge, Cambridge, CB2 0QQ, UK

8

9 \* Corresponding author: emb@sanger.ac.uk

10

11

## 12 **Abstract**

13 Background:

14 The neural crest (NC) is a vertebrate-specific cell type that contributes to a wide range of  
15 different tissues across all three germ layers. The gene regulatory network (GRN) responsible  
16 for the formation of neural crest is conserved across vertebrates. Central to the induction of  
17 the NC GRN are *AP-2* and *SoxE* transcription factors but detailed interactions within the  
18 network remain to be resolved.

19 Results:

20 We have used gene knockout and RNA sequencing strategies to dissect NC differentiation in  
21 zebrafish. We establish that initiation of the NC GRN takes place just after genome activation.  
22 We genetically ablate the NC using double mutants of *tfap2a;tfap2c* or remove specific  
23 subsets of the NC with *sox10* and *mitfa* knockouts and characterise genome-wide gene  
24 expression levels across multiple time points. We find that although a single allele of *tfap2c* is  
25 capable of maintaining early NC induction and differentiation in the absence of *tfap2a* function,  
26 expression of many target genes remains abnormal and sensitive to *tfap2* dosage. This  
27 separation of morphological and molecular phenotypes identifies a core set of genes required  
28 for early NC development. Using gene knockouts, we associate previously uncharacterised  
29 genes with pigment cell development and establish a role for maternal Hippo signalling in  
30 melanocyte differentiation.

31 Conclusions:

32 Stepwise genetic ablation of the NC identifies the core gene module required for neural crest  
33 induction. This work extends and refines the NC GRN while also uncovering the complex  
34 transcriptional basis of genetic compensation via paralogues.

35

## 36 **Keywords**

37 neural crest, *tfap2a*, *tfap2c*, *sox10*, *mitfa*, *yap1*, Hippo signalling, transcriptome, RNA-Seq,  
38 paralogue, genetic compensation

39

## 40 **Background**

41 Development from a single fertilised cell to the complex adult form requires a simultaneously  
42 robust and plastic gene regulatory program. The neural crest is a transient pluripotent stem  
43 cell population capable of crossing germ layer boundaries and differentiating into highly  
44 diverse tissue types while migrating long distances in the developing embryo. The  
45 establishment of the neural crest and its subsequent tissue derivatives is specific to  
46 vertebrates and has played a fundamental role in their variation and evolutionary success [1–  
47 3]. Neural crest cells require a complex combination of external inductive signals such as  
48 Wnts, Fgfs, Notch/delta and Bmps (Fig. 1a). These extrinsic signals can be considered the  
49 first phase of the neural crest gene regulatory network (GRN) followed by a second phase of  
50 tightly controlled intrinsic gene expression. Two of these intrinsic signals of fundamental  
51 importance for evolution and development of the neural crest that set vertebrates apart from  
52 other chordates such as amphioxus and tunicates are the *AP-2* and *SoxE* genes families. [4–  
53 8].

54 Mutations in neural crest genes lead to disease in humans, highlighting the importance of this  
55 cell population for human health. Animal models faithfully recapitulate these defects  
56 demonstrating functional conservation. In humans and mice, mutations in *TFAP2A* lead to  
57 branchio-oculo-facial syndrome presenting as defects in cranial development and cranial  
58 closure [9,10]. Similarly, mutations in zebrafish *tfap2a* lead to craniofacial defects in addition  
59 to a reduction in melanocytes [11,12]. The *Tfap2* family arose from a single gene in a chordate

60 ancestor that underwent gene duplication resulting in five family members in zebrafish.  
61 Removing combinations of *tfap2* family members results in a wide array of phenotypes. For  
62 example, the neural crest is completely ablated in *tfap2a;tfap2c* zebrafish whereas there is a  
63 dramatic and specific reduction of melanocytes in *tfap2a;tfap2e* zebrafish embryos [13–18].  
64 Furthermore, melanomas, squamous cell carcinomas, most skin and breast cancers and a  
65 few cervical and urothelial cancers have strong nuclear immunoreactivity for TFAP2A. [19,20].

66 Haploinsufficiency of *SOX10* results in Waardenburg syndrome; patients exhibit defects in the  
67 peripheral and enteric nervous systems and also pigmentation defects [21,22]. Similar to  
68 humans, mice affected by the Dominant megacolon mutation *Sox10<sup>Dom</sup>* also have defects in  
69 melanocyte development, enteric neuron defects and develop megacolon as heterozygotes  
70 [23]. Homozygous knockouts of murine *Sox10* are embryonic lethal and also lead to strong  
71 myelination phenotypes and an overall lack of peripheral glia [24].

72 The expression of *sox10* is first detectable in premigratory neural crest cells and expression  
73 is maintained in certain neural crest lineages, for example glia, but reduced in many other neural  
74 crest-derived tissues in zebrafish [25–27] and mouse [28–30]. Following neural crest  
75 induction, *sox10* plays a vital role in the establishment of non-ectomesenchymal neural crest  
76 cells in zebrafish. Knockouts in zebrafish *sox10* behave in a recessive manner and lead to the  
77 absence of enteric neurons, chromatophores, Schwann cells, sensory neurons and other trunk  
78 crest cell types [31,25,32]. Craniofacial features appear to be largely unaffected in zebrafish  
79 *sox10* mutants, which is thought to be due to compensation by the *SoxE* family member *sox9b*  
80 in ectomesenchymal neural crest [33,34]. *Sox10* has also been shown to play a continued role  
81 in the maintenance and differentiation of adult melanocyte stem cells in mouse [35,36].

82 Melanoma, a highly aggressive form of cancer originating from neural crest-derived  
83 melanocytes, shows signs of melanocytes reverting to a crest like state as part of their disease  
84 progression [37–39]. Recently, *SOX10* has also been shown to play a crucial role in the  
85 overlapping identity of neural crest stem cells and melanoma, where silencing of *SOX10*

86 suppresses the neural crest stem cell-like properties in melanoma [38]. Together these data  
87 indicate a role for the neural crest differentiation pathway in melanomagenesis.

88 Many crucial transcription factors involved in the neural crest GRN have been identified and  
89 studied in depth across a number of different species, but a lot of their downstream targets  
90 and interaction partners still remain to be elucidated. For example, TFAP2A ChIP-Seq analysis  
91 using human neural crest cells has identified over 4,000 potential TFAP2A binding sites and  
92 established TFAP2A as a chromatin initiating factor [40]. This large number of putative  
93 TFAP2A downstream targets now requires functional validation.

94 To identify novel effectors and temporal trajectories of the *tfap2a;tfap2c* and *sox10* neural  
95 crest network we used zebrafish mutants in genes required at different levels of neural crest  
96 differentiation in a single whole embryo transcriptomic screen across different developmental  
97 stages. This screen involved genotyping individual embryos at all relevant developmental  
98 stages before sequencing their mRNA. Using a high number of replicates has proven vital in  
99 identifying true neural crest signal while also highlighting genetic background effects such as  
100 haplotype-specific expression. Stepwise genetic ablation of *tfap2* signalling uncovers dose-  
101 dependent genetic compensation between paralogues. To validate novel candidates  
102 emerging from this analysis we applied a reverse genetics approach to knock out genes of  
103 interest using both ENU and CRISPR/Cas9 mutagenesis [41–43]. Taken together, this work  
104 has identified early activation of the neural crest GRN and the core gene set underlying genetic  
105 compensation of *tfap2a* or *tfap2c* perturbations. Our screen has also identified novel  
106 downstream neural crest genes and a role for maternal expression of the Hippo signalling  
107 member *yap1* in the differentiation of melanocytes. All resources are publically available and  
108 we envisage that this will lead to a deeper understanding of neural crest biology.

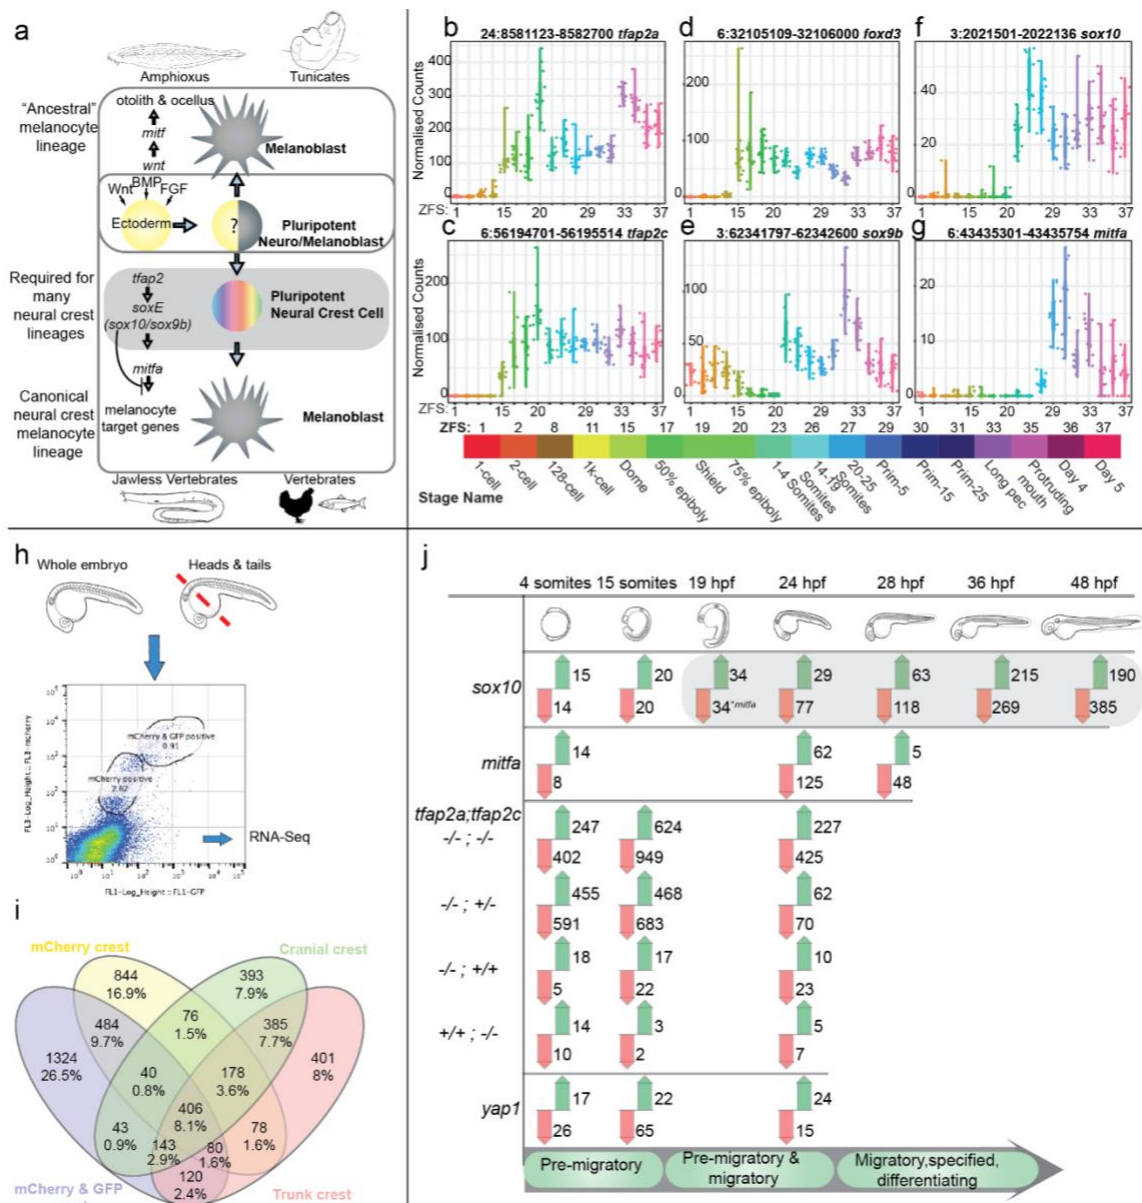

**Figure 1 Analysis of the zebrafish NC GRN using gene expression data, knockouts and tissue-specific sequencing.**

**a** The NC is induced by different morphogens, for example Wnt, BMP and FGF acting on ectoderm. Non-vertebrate chordates lack NC cells but are capable of producing pigmented cells and otoliths via *mitf*. AP-2 and SoxE family genes are required in vertebrates to form the NC and these also contribute to the differentiation of specific NC tissues types. **b-g** 3' end transcriptome sequencing (DeTCT) of six key neural crest transcription factors (*tfap2a*, *tfap2c*, *foxd3*, *sox9b*, *sox10*, *mitfa*) across 18 developmental time points covering zygote to 5 dpf. Normalised counts of individual embryos are plotted for each stage. The mapped Zv9 genomic positions of each 3' end are at the top of the plots next to the gene names. ZFS numbers are labelled with their corresponding stage names and representative colouring. **h** FACS of dissociated *sox10:mg* was sorted based on mCherry and GFP signals at 22-23 hpf and were either sorted as whole embryos or separated heads and tails. Multiple replicates of each cell population were harvested and sequenced via RNA-Seq. **i** FACS transgenic populations were compared to non-transgenic populations using DESeq2 to produce gene enrichment lists for each population. The enriched gene lists for the mCherry and mCherry/GFP population from whole embryos and mCherry and/or GFP positive populations from the head or trunk were then compared to each other as a Venn diagram. **j** An overview of

the transcriptomics loss of function analysis using 3' tag sequencing, carried out at stages of premigratory, migratory and differentiating neural crest cells. The phases of NC differentiation are noted at the bottom. Changing genes at adj. p-value <0.05 when compared to wild-type siblings are represented with green arrows for increased and with red arrows for decreased abundance. The *sox10* downstream target *mitfa* is first detected as reduced at 19 hpf.

## 109 **Results**

110  
111 Our collection of mutations in previously well studied zebrafish mutants (*tfap2a*, *tfap2c*, *sox10*  
112 and *mitfa*) as well as a newly associated neural crest mutant (*yap1*—this study) encompasses  
113 an early undifferentiated, premigratory neural crest state through to terminal differentiation of  
114 different crest cell types, in particular the melanocytes.

### 115 **Neural crest GRN is initiated at genome activation**

116 Neural crest cells can be readily identified as the first somites begin to form, however it is not  
117 clear when the neural crest GRN becomes active in the zebrafish embryo. We used a wild-  
118 type developmental time course we had published previously [44] encompassing 18 stages  
119 from zygote to 5 dpf to identify the specific time points at which relevant transcripts are  
120 activated and their expression over time. In addition, the use of single embryos reveals the  
121 natural variation across individuals (Fig. 1b-g). In zebrafish, the genome first becomes  
122 transcriptionally active between the 1K-Cell and Dome stage [45–47]. A number of early neural  
123 crest transcription factors - *foxd3*, *tfap2a*, *tfap2c* - can be detected at the Dome stage, which  
124 is much earlier than neural crest has typically been thought to be induced (Fig. 1b-d) [2]. Their  
125 downstream targets *sox9b* and *sox10* begin to be expressed between 75% epiboly and when  
126 the first somites appear (Fig. 1e-f). Both *sox9b* and *sox10* have been shown to be robust  
127 markers for premigratory neural crest cells in zebrafish [48].

### 128 **Identification of a neural crest–enriched gene set**

129 We first created a catalogue of genes enriched in premigratory and differentiating neural crest  
130 cells as a reference set for the subsequent transcriptional analysis of the neural crest mutants.

131 We used Fluorescence-Activated Cell Sorting (FACS) on dissociated cells from whole  
132 embryos of the *sox10:mg* line [49] at 22-23 hours post fertilisation (hpf). The transgenic  
133 reporter labels neural crest nuclei (mCherry) and crest cell membranes (GFP). At 22-23 hpf  
134 neural crest cells migrate along the anterior-posterior axis and their differentiation is more  
135 advanced at the rostral than caudal part of the embryo. We therefore reasoned that this stage  
136 would provide us with a comprehensive mixture of neural crest differentiation states. We  
137 observed a delay in the membrane bound GFP signal causing two separate neural crest  
138 populations; one labelled only with the nuclear mCherry marker, and a second labelled both  
139 with mCherry and the membrane bound GFP (Fig. 1h). We sorted these two populations  
140 separately along with a third non-transgenic population for pairwise differential expression  
141 analysis, however for the purposes of this study we pooled the neural crest cell data. Our  
142 second aim was to assess whether we could gain more information by investigating the  
143 transcriptional profiles of cranial crest and trunk crest separately. We separated heads and  
144 tails of embryos from the same stage and isolated a single neural crest population from each  
145 tissue type comprising both mCherry+ and mCherry+/GFP+ cells as well as an unlabelled non-  
146 crest population. All cell populations were processed to produce polyA RNA-Seq libraries and  
147 sequenced. We compared transcripts detected in the transgenic neural crest cell populations  
148 to the non-crest cells using DESeq2 to produce neural crest-enriched gene sets (Fig. 1i). For  
149 comparison to our whole embryo data we pooled the resulting gene lists from the individual  
150 FACS experiments to produce a set of 4995 genes enriched in any FACS neural crest cell  
151 population (Table 1).

## 152 ***sox10* knockouts effects on downstream targets appear transcriptionally at 19 hpf**

153 In order to establish the initiation of the *sox10* GRN, a downstream target of *tfap2a;tfap2c*, we  
154 first created a transcriptional loss of function time course of *sox10* and its target, *mitfa*, by  
155 comparing gene expression of homozygous mutants and siblings. Zebrafish *sox10* mutant  
156 embryos form premigratory neural crest cells in the trunk but these cells fail to migrate and  
157 properly differentiate while cranial crest remain largely unaffected [25]. Mutants of the *sox10*



158 downstream target *mitfa* have mostly correctly differentiated neural crest but specifically lack  
159 melanocytes of the body while showing mild differences in the numbers of the other two  
160 pigment cell types xanthophores and iridophores [50].

161 Figure 1j is an overview of all experiments carried out using DeTCT (differential expression  
162 transcript counting technique) 3' tag sequencing [51]. Although *sox10* is appreciably  
163 expressed at the 1-4 somites stage (~10 hpf) (Fig. 1f) it is only at the 19 somite stage (19 hpf)  
164 where we detected a reduction in the abundance of one of its downstream targets, *mitfa*, in  
165 *sox10* knockout embryos (Fig. 1j). The majority of genes changing in the *sox10* 4 somite, 15  
166 somites and 19 somites stages are localised on chromosome 3, the same chromosome as  
167 *sox10*, and are an example of haplotype-specific expression signals (Figure 1j, Table 1). We  
168 also found similar signals for the *mitfa* mutants at 4 somites with a very strong enrichment for  
169 chromosome 6 at 24 hpf (Table 1). Haplotype-specific signals will be discussed later.

170 We next analysed enrichments of terms from the Zebrafish Anatomy Ontology (ZFA)  
171 associated with differentially expressed genes and plotted all time points with significant  
172 enrichments (Supplemental Fig. 1). As expected, we found a strong and specific melanocyte  
173 signal in both mutants across all time points, with *sox10* mutants also showing a strong  
174 enrichment at 24 hpf for xanthophores and iridophores. By 36 hpf we also found an enrichment  
175 for the terms peripheral nervous system and nervous system which is consistent with an  
176 established role for *sox10* in peripheral nervous system development [25]. Previous data [25]  
177 and our developmental time course show that the expression of *sox10* begins early, following  
178 the establishment of the first neural crest cells at about 4 somites. It is only at the 19 somite  
179 stage, however, in which we detect the first molecular signal via the reduction of *mitfa*  
180 transcript, and only at 24 hpf do we see the first ZFA enrichments.

181

182 **Transcriptomic profiling of neural crest genetic ablation at three developmental stages**  
183 **using 3' tag sequencing.**

184 Based on the wild-type expression of *tfap2a* and *tfap2c*, the morphological double mutant  
185 phenotype and the *sox10* molecular phenotype we chose three time points, 4 somite, 15  
186 somites and 24 hpf, for the transcriptomic screen of *tfap2a;tfap2c* mutants. At the 4 somite  
187 stage pluripotent neural crest stem cells should be well established based on *snail1b*  
188 expression [34] and detectable with a whole embryo transcriptomic approach.

189 To genetically ablate the neural crest, we created double carrier fish for  
190 *tfap2a*<sup>+/*sa24445*</sup>;*tfap2c*<sup>+/*sa18857*</sup> (denoted as *tfap2a*<sup>+/-</sup>;*tfap2c*<sup>+/-</sup> from here on) alleles, using mutants  
191 produced by the Zebrafish Mutation Project (ZMP  
192 <http://www.sanger.ac.uk/resources/zebrafish/zmp/>) [41]. We confirmed the phenotypes  
193 previously described in *tfap2a;tfap2c* depletion experiments [15,18]. Double homozygous  
194 embryos were indistinguishable from wild-type siblings at the 4 somites stage but were slightly  
195 elongated/dorsalised by the 15 somites stage and were clearly discernible by 24 hpf (Fig. 2a-  
196 b). Notably, we also identified a specific pattern of reduction of dorsal tail melanocytes in  
197 *tfap2a*<sup>-/-</sup>;*tfap2c*<sup>+/-</sup> embryos at 48 hpf (Fig. 2c) in addition to the melanocyte reduction previously  
198 noted in *tfap2a*<sup>-/-</sup> embryos which demonstrates a dosage effect of *tfap2c* heterozygosity on  
199 *tfap2a* homozygous mutants. All other genotypic combinations were indistinguishable from  
200 their wild-type siblings at 48 hpf with *tfap2a*<sup>-/-</sup> carriers progressing to present craniofacial  
201 defects at 72 hpf as previously described [14].

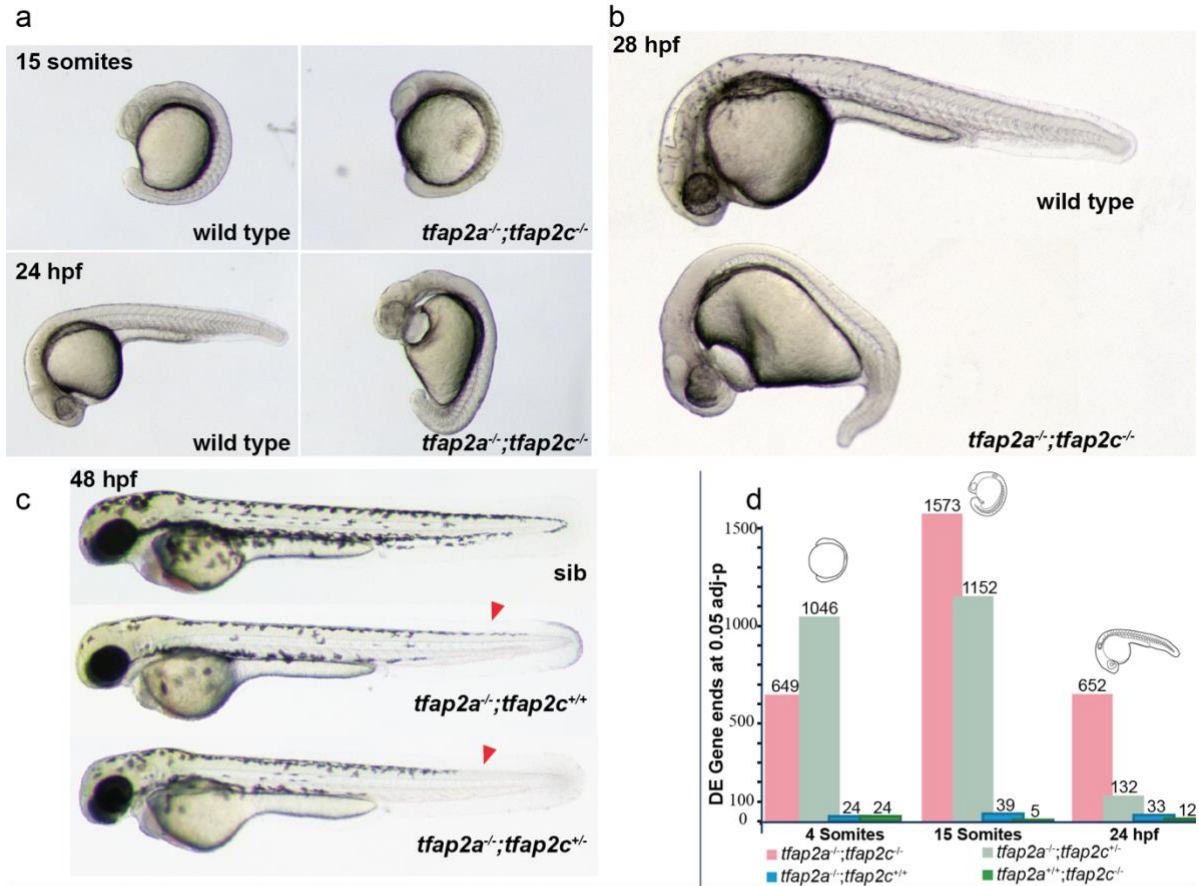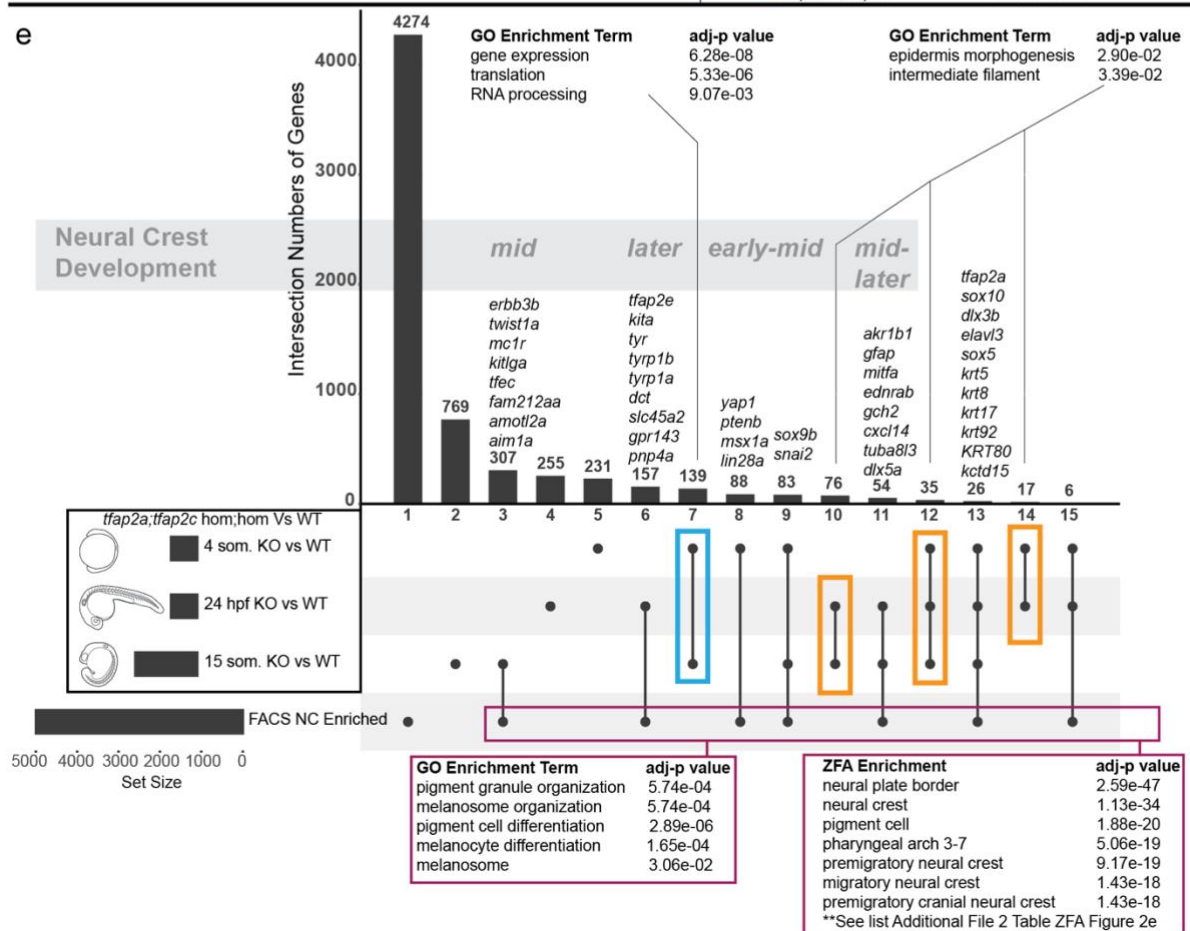

**Figure 2 Molecular profiling of *tfap2a*;*tfap2c* mutants across multiple time points using 3' tag sequencing.**

**a** *tfap2a*<sup>-/-</sup>;*tfap2c*<sup>-/-</sup> mutants present the first morphological phenotypes at the 15 somite stage. **b** By 28 hpf the morphological phenotype leads to an overall dorsalised form, bifurcation of the forming eye, heart oedema, and complete lack of neural crest cells. All other genotypes appear normal. **c** At 48 hpf the previously described reduction of melanocytes can be noted in *tfap2a*<sup>-/-</sup>;*tfap2c*<sup>+/+</sup> embryos and a modest reduction of melanocytes can be identified in the dorsal tail (red arrow heads) in *tfap2a*<sup>-/-</sup>;*tfap2c*<sup>-/-</sup> mutants. **d** Chart indicating the number of differentially expressed gene 3' ends identified with an adjusted p-value of ≤0.05 for each pairwise comparison of genotypes *tfap2a*<sup>-/-</sup>;*tfap2c*<sup>-/-</sup>, *tfap2a*<sup>-/-</sup>;*tfap2c*<sup>+/+</sup>, *tfap2a*<sup>-/-</sup>;*tfap2c*<sup>+/+</sup> and *tfap2a*<sup>+/+</sup>;*tfap2c*<sup>-/-</sup> to *tfap2a*<sup>+/+</sup>;*tfap2c*<sup>+/+</sup> siblings at 4 somites, 15 somites and 24 hpf **e** An UpSet diagram of the DE gene lists derived from the *tfap2a*<sup>-/-</sup>;*tfap2c*<sup>-/-</sup> vs. wild-type siblings (adj. p-value <0.05) for the 4 somites, 15 somite and 24 hpf stages and the list of neural crest enriched genes derived from sorted neural crest cells at 22-23 hpf. Individual subsets are marked with a black dot and overlaps with a connecting line. The total numbers of the subsets are represented with bars and number of genes above. GO enrichment was carried out on the subset found only in the 4 somites and 15 somites stages (blue box), the subsets indicated with the orange boxes and on all genes contained in the neural crest FACS enrichment and in at least one of the three different double knockout time points (magenta box). Using the developmental time course nature of the data allows for the grouping of the subsets into timing based on neural crest development starting with *early* neural crest specific gene expression and then moving towards *early-mid*, *mid*, *mid-later* and *later*.

202 In light of the observed phenotypes stemming from a dosage effect of *tfap2c* heterozygosity  
203 in *tfap2a* homozygous mutants our primary aim was to systematically investigate the genetic  
204 interactions of *tfap2a* and *tfap2c*. We therefore sequenced up to 10 embryos for all 9  
205 genotypes at the three different stages to enable comparison of all genotypic combinations.  
206 We crossed double heterozygous *tfap2a*;*tfap2c* parents and collected embryos at the three  
207 developmental time points as single embryos. Following nucleic acid extraction and  
208 genotyping, single embryos were processed and global mRNA transcript levels determined  
209 using 3' tag sequencing (Fig. 1j). After quality control and the removal of outlier samples we  
210 carried out pairwise analysis using DESeq2.

211 **Transcriptional phenotypes in *tfap2a* and *tfap2c* mutants differ greatly in magnitude**  
212 **when compared to their morphological outcomes**

213 We first assessed how the transcriptomes of the different genotypic conditions behaved across  
214 time. Comparing the absolute numbers of differentially expressed (DE) genes of the four most  
215 relevant knockout genotypes over the three developmental time points revealed three major

216 findings (Fig. 2d). Firstly, when compared to wild-type siblings, the number of genes  
217 differentially expressed in both *tfap2a* or *tfap2c* single homozygous embryos is very small in  
218 contrast to the double homozygous knockout and the *tfap2a<sup>-/-</sup>;tfap2c<sup>+/-</sup>* mutants indicating  
219 genetic compensation. Secondly, despite the severe morphological phenotype of double  
220 mutants at 24 hpf the number of DE genes was less than half of that at the 15 somites stage.  
221 Conversely, while only beginning to display a mild morphological phenotype at 48 hpf the  
222 *tfap2a<sup>-/-</sup>;tfap2c<sup>+/-</sup>* mutants showed a strong molecular phenotype at 4 and 15 somites, with a  
223 longer DE list at 4 somites than the double mutants. This molecular signature was strongly  
224 diminished by 24 hpf. Taken together this demonstrates that the complexity of transcriptional  
225 changes is not necessarily mirrored in the morphological phenotype, and vice versa.

#### 226 **Overlapping multiple expression profiles groups genes by biological function**

227 Next we analysed the transcriptional profile of complete ablation of the neural crest in *tfap2a<sup>-/-</sup>;*  
228 *tfap2c<sup>-/-</sup>* knockouts. A role for *tfap2a* has been previously described in both neural and non-  
229 neural ectoderm tissues which lead to the formation of the neural crest and the epidermis,  
230 respectively [15,52]. To separate transcripts into subsets specific to the neural crest or the  
231 epidermis we filtered the DE genes from the three developmental time points in *tfap2a<sup>-/-</sup>;tfap2c<sup>-/-</sup>*  
232 knockouts relative to wild-type siblings with the list of 4995 FACS-identified neural crest  
233 genes (Fig. 2e)[53]. When all genes which appear in at least one of the developmental stages  
234 and the neural crest FACS list are analysed together with their associated GO terms, there is  
235 an enrichment for pigment cells and melanocytes but no other neural crest subtypes (magenta  
236 box Fig. 2e). However, zebrafish anatomy enrichment (ZFA) returns a strong enrichment for  
237 the neural crest (Fig. 2e, Additional File 1). This finding highlights the current limitations of  
238 zebrafish GO annotation which has a bias for genes linked to pigmentation and lacks  
239 annotation for genes associated with earlier neural crest states.

240 A relatively small group of 26 genes appearing in all 4 data sets included *tfap2a*, *sox10* and  
241 many keratins. This could potentially signify an epidermal/neural crest precursor cell type  
242 which is in the process of committing to one of the lineages.

243 Comparison of the three developmental time points places genes into “early,” “mid,” and  
244 “later” neural crest-specific groups. Each of these groups contain numerous examples of  
245 previously characterised neural crest-specific genes which helps to validate this approach, but  
246 also many unannotated genes or genes previously not associated with the neural crest (Table  
247 1).

248 The gene lists shared between the different stages but not found in the neural crest FACS  
249 data set (orange boxes Fig. 2e) and their Gene Ontology (GO) term annotation revealed an  
250 enrichment for epidermal-related terms. Another subset from the 4 somite and 15 somite  
251 stages that is not present in the NC-enriched gene list is a group of genes enriched for  
252 *expression*, *translation* and *RNA processing* (blue box Fig. 2e).

### 253 ***tfap2a;tfap2c* genetic compensation**

254 Our next question was how the transcript levels of *tfap2a* and *tfap2c* along with three well  
255 characterised neural crest-specific genes (*foxd3*, *sox10* and *sox9b*) behaved across all 9  
256 genotypes and the three developmental stages (Fig. 3a-o). At 4 somites, embryos  
257 homozygous for either *tfap2a* or *tfap2c* had significantly lower transcript abundances for their  
258 respective genes indicating that nonsense-mediated decay had most likely occurred (Fig. 3a-  
259 b)[54]. A genetic interaction is evident in *tfap2a*<sup>-/-</sup>;*tfap2c*<sup>+/+</sup> embryos between *tfap2a* and *tfap2c*  
260 with higher levels of wild-type *tfap2c* transcripts than in wild-type siblings (Fig. 3b) while *tfap2a*  
261 is not increased in the inverse case of *tfap2a*<sup>+/+</sup>;*tfap2c*<sup>-/-</sup> mutants (Fig. 3a). This indicates that  
262 already by the 4 somite stage, the neural crest GRN is able to detect reduced levels of *tfap2a*  
263 in knockouts and compensation by *tfap2c* is established. *foxd3* is significantly reduced in both  
264 *tfap2a*<sup>-/-</sup>;*tfap2c*<sup>-/-</sup> and *tfap2a*<sup>-/-</sup>;*tfap2c*<sup>+/-</sup> embryos compared to wild-type siblings, but not in  
265 *tfap2a*<sup>-/-</sup>;*tfap2c*<sup>+/+</sup> embryos, providing further evidence for a compensatory role of *tfap2c* when

266 levels of *tfap2a* are reduced. Both *sox10* and *sox9b* behave in a similar manner to *foxd3* at 4  
 267 somites. These data also demonstrate that only one of the possible four *tfap2a* or *tfap2c* alleles  
 268 is required to ensure early neural crest cell identity and differentiation.

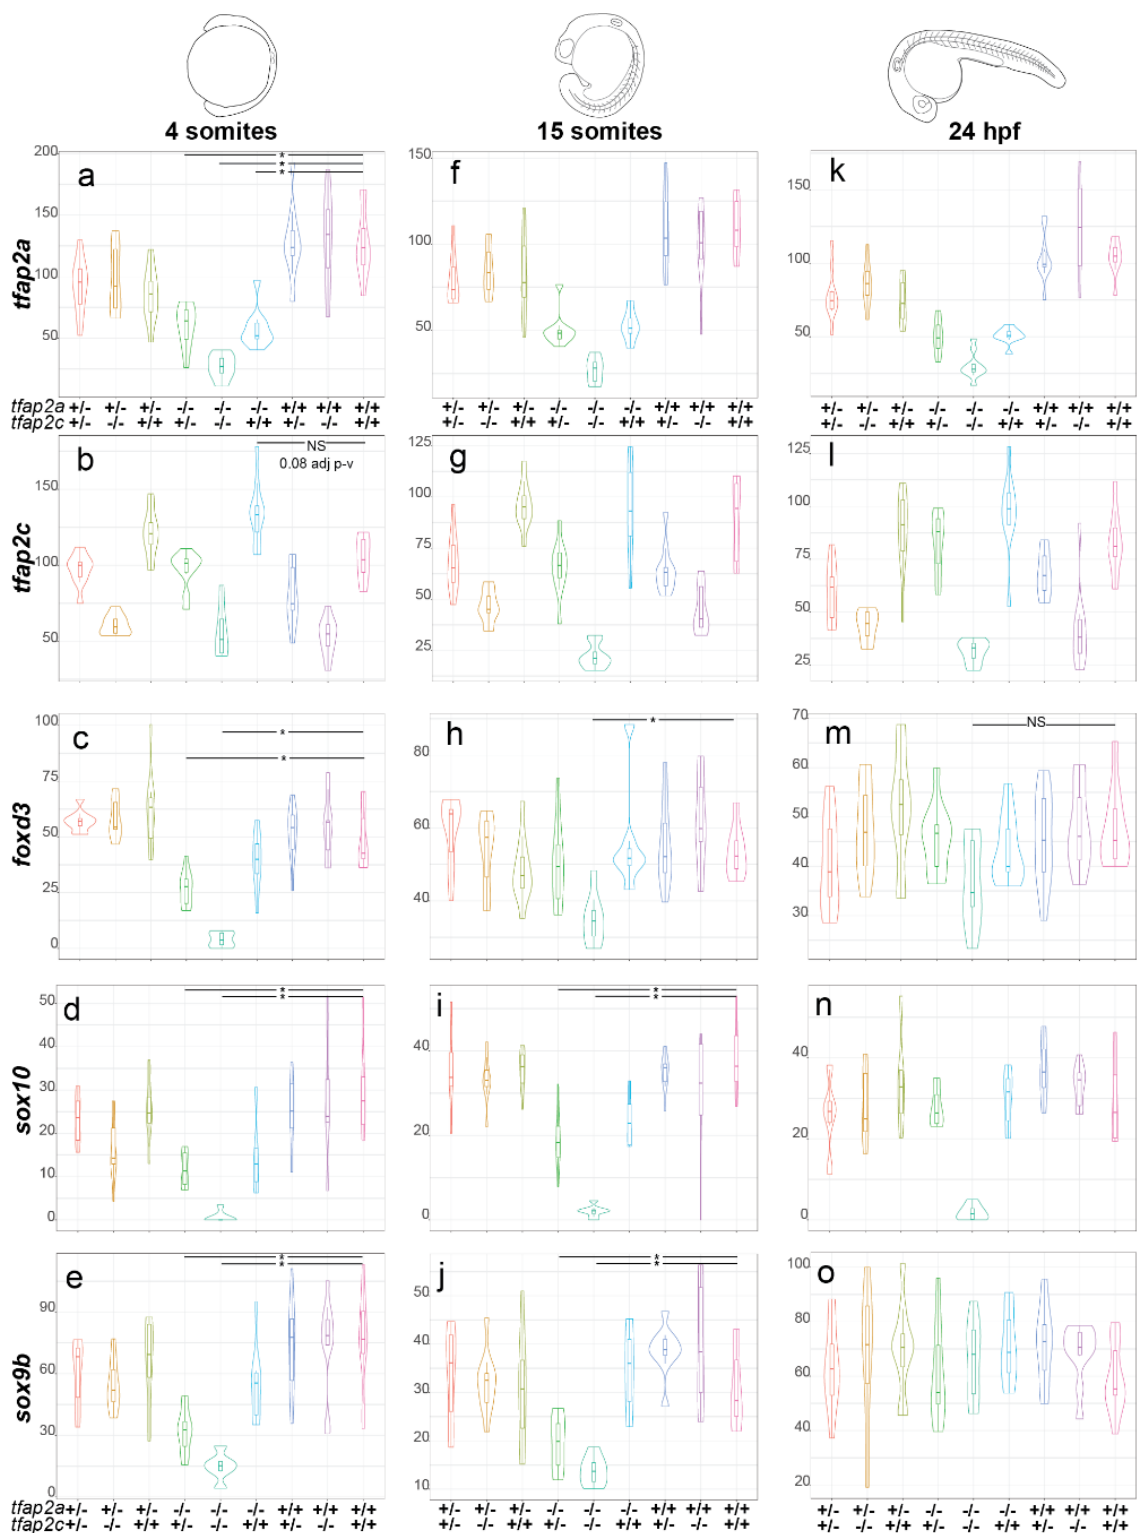

**Figure 3 Expression of *sox10*, *sox9b* and *foxd3* in *tfap2a;tfap2c* mutants across 3 developmental time points.**

Normalised counts and gene name to the left of the violin plots and the corresponding genotypes for *tfap2a* and *tfap2c* at the bottom. All plots are ordered by the time points shown on the top of the figure. **a** At 4 somites levels of *tfap2a* are significantly lower than in wild-type siblings in all *tfap2a*<sup>-/-</sup> genotypes. **b** Levels of *tfap2c* present at elevated levels in *tfap2a*<sup>-/-</sup>;*tfap2c*<sup>+/-</sup> embryos when compared to wild-type siblings but fail the statistical cut off with 0.08 adj p-value. **c-e** Levels of *foxd3*, *sox10* and *sox9b* are significantly different in both *tfap2a*<sup>-/-</sup>;*tfap2c*<sup>+/-</sup> and *tfap2a*<sup>-/-</sup>;*tfap2c*<sup>-/-</sup> embryos but not in *tfap2a*<sup>-/-</sup>;*tfap2c*<sup>+/-</sup>. **f-g** At 15 somites the levels of *tfap2a* and *tfap2c* recapitulate trends observed at 4 somites stage. **h** Levels of *foxd3* are only significantly different in *tfap2a*<sup>-/-</sup>;*tfap2c*<sup>-/-</sup> embryos when compared to wild-type siblings. **i-j** The levels of *sox10* and *sox9b* are both significantly different in *tfap2a*<sup>-/-</sup>;*tfap2c*<sup>+/-</sup> and *tfap2a*<sup>-/-</sup>;*tfap2c*<sup>-/-</sup> embryos compared to wild-type siblings. **k-l** The profiles of *tfap2a* and *tfap2c* at 24 hpf again remain similar to the two previous time points across all genetic combinations. **m** At 24 hpf the levels of *foxd3* are not significantly different across any genotypes. **n** The levels of *sox10* are markedly down in only the *tfap2a*<sup>-/-</sup>;*tfap2c*<sup>-/-</sup> embryos and levels of *sox9b* are unchanged across all genotypes **o**. Statistical significance of below 0.05 adj p-value is denoted with a \*. Not all significant differences have been labelled. NS is to emphasise pairwise comparisons which fail an adj. p-value <0.05 cut off.

269

270 At 15 somites the transcriptional profiles of *tfap2a* and *tfap2c* remain similar to the 4 somite  
271 stage (Fig. 3f-g). Levels of *foxd3*, *sox10* and *sox9b* all remain significantly reduced in *tfap2a*<sup>-/-</sup>  
272 *tfap2c*<sup>-/-</sup> embryos (Fig. 3h-j) while in *tfap2a*<sup>-/-</sup>*tfap2c*<sup>+/-</sup> embryos *foxd3* levels have begun to  
273 recover but expression of *sox10* and *sox9b* is still reduced.

274 By 24 hpf the abundance of *tfap2a* and *tfap2c* remains much the same as the previous  
275 developmental stages (Fig. 3k-l). Interestingly, *foxd3* and *sox9b* levels are no longer  
276 significantly different in *tfap2a*<sup>-/-</sup>;*tfap2c*<sup>-/-</sup> embryos which is suggestive of their exit from the  
277 neural crest GRN or initiation of expression in non-neural crest tissues, but levels of *sox10*  
278 remain strongly reduced in the double mutants (Fig. 3m-o). Also, *tfap2a*<sup>-/-</sup>;*tfap2c*<sup>+/-</sup> embryos  
279 now have levels of *foxd3*, *sox9b* and *sox10* comparable to wild type which suggests a general  
280 recovery of the neural crest GRN by this stage. These data show that the time point of the  
281 strongest molecular phenotype and *tfap2c* compensation is at around 4-15 somites with the  
282 morphological phenotypes beginning to emerge by 15 somites.

283 **RNA-Seq on *tfap2a*;*tfap2c* knockouts at 15 somites confirms 3' tag sequencing data**  
284 **and produces a more detailed transcriptional landscape**



285 To further investigate the dose-dependent compensation while also creating a more detailed  
286 transcriptomic profile of pluripotent and differentiating neural crest cells, we carried out RNA-  
287 Seq on *tfap2a;tfap2c* knockouts at the 15 somite stage. All 9 genotypes were assessed using  
288 a total of 90 single embryos. Principal component analysis highlights that *tfap2a<sup>-/-</sup>;tfap2c<sup>-/-</sup>* and  
289 *tfap2a<sup>-/-</sup>;tfap2c<sup>+/-</sup>* are most similar on a molecular level in spite of their vastly different  
290 morphological phenotypes (Supplemental Fig. 2a). Pairwise comparisons of four different  
291 genotypes to their wild-type siblings shows high numbers of genes changing in both *tfap2a<sup>-/-</sup>*  
292 *;tfap2c<sup>-/-</sup>* and *tfap2a<sup>-/-</sup>;tfap2c<sup>+/-</sup>* groups (Supplemental Fig. 2b, Table 1). The majority of  
293 significant genes have reduced transcript levels in double mutants with robust p-values  
294 (Supplemental Fig. 2c). The 15 somite 3' tag sequencing and RNA-Seq data sets showed  
295 good correlation of the detected DE genes at an adjusted p-value < 0.01 (Supplemental Fig.  
296 2d)

297 Hierarchical clustering on the significantly changed genes from the *tfap2a<sup>-/-</sup>;tfap2c<sup>-/-</sup>* versus  
298 wild type pairwise comparison and ZFA enrichment placed genes into functional groups. While  
299 loss of both *tfap2a* and *tfap2c* leads to a reduction in genes involved in neural crest and  
300 epidermis development it also leads to an upregulation of genes associated with neural terms  
301 (Supplemental Fig. 2e).

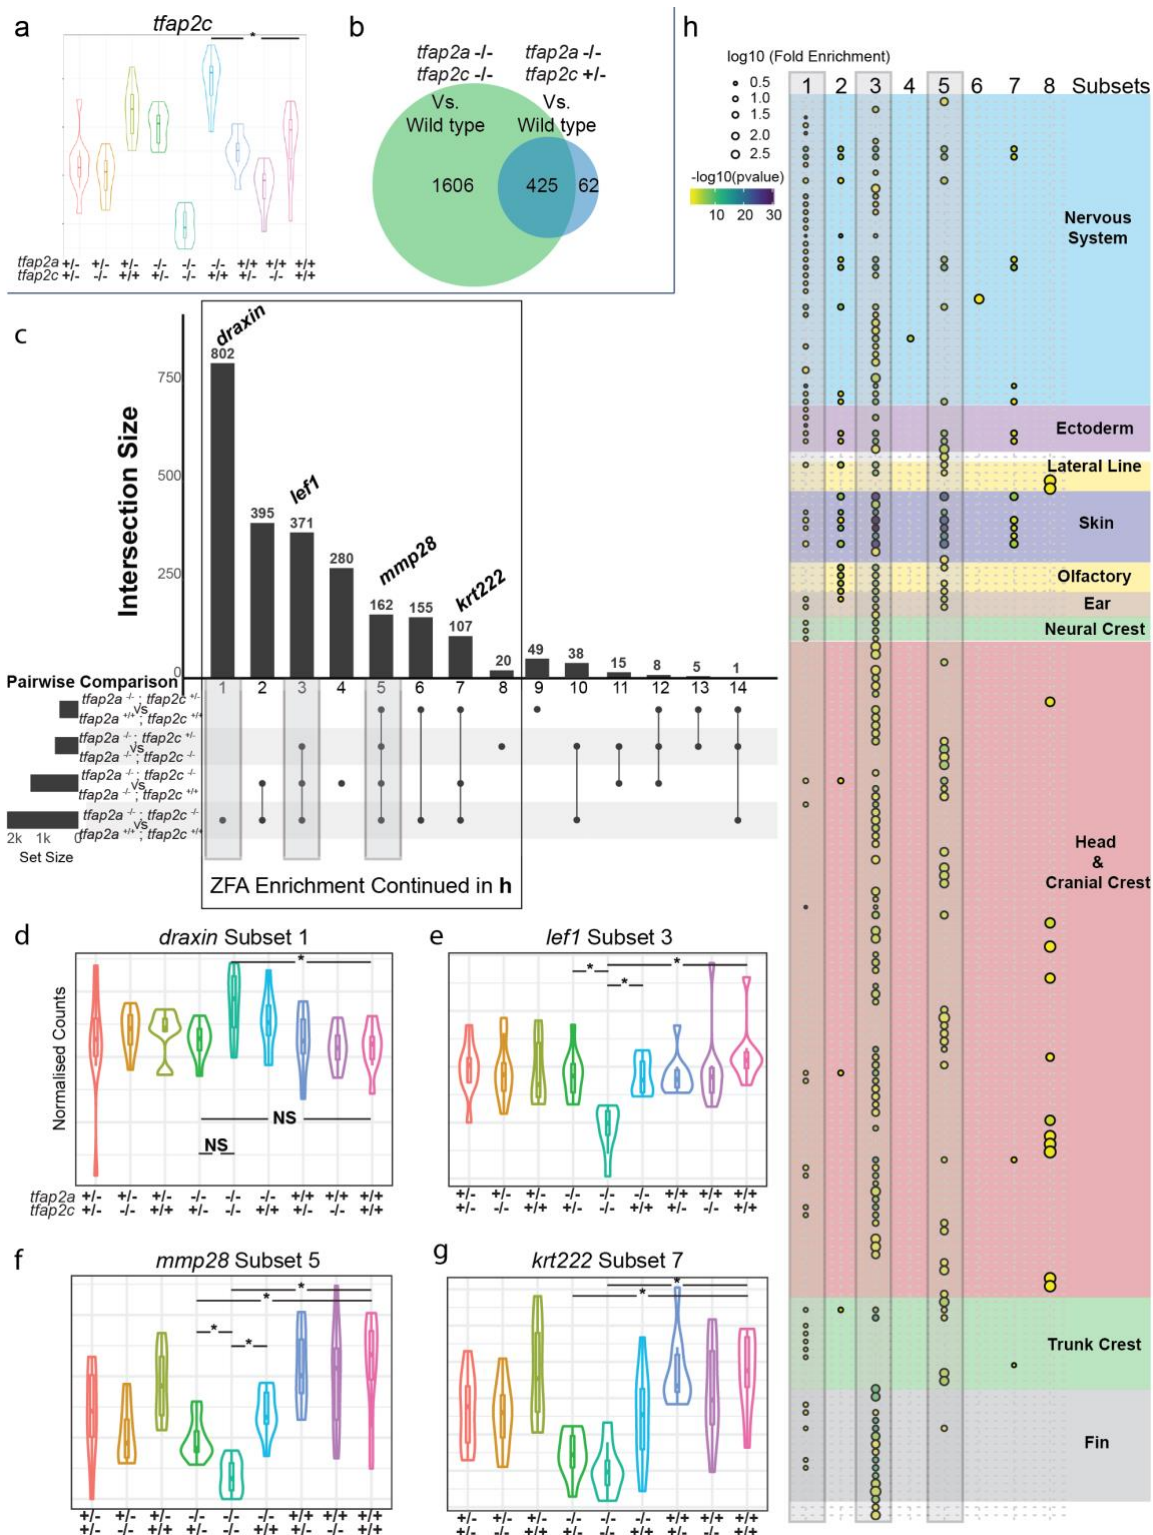

**Figure 4 Identification of NC specific gene subsets in *tfap2a;tfap2c* mutant RNA-Seq 15 somite data.**

**a** RNA-Seq at 15 somites, an \* indicates a significant (adj. p-value <0.05) increase of *tfap2c* transcript in *tfap2a*<sup>-/-</sup>*tfap2c*<sup>+/-</sup> embryos when compared to wild-type siblings. **b** Overlapping gene lists comparison of significantly (adj. p-value <0.05) differentially expressed genes when *tfap2a*<sup>-/-</sup>*tfap2c*<sup>-/-</sup> and *tfap2a*<sup>-/-</sup>*tfap2c*<sup>+/-</sup> are compared to wild type siblings. **c** Subsetting of gene lists from four different pairwise comparisons. The subsets are labelled 1-14 and the genes from **d-g** labelled at the top of the groups they belong to. Groups 1, 3 and 5 have

grey boxes around their overlapping groups. **d-g** Examples of violin plots for the four subset groups with “\*” signifying a <0.05 adj p-value between two groups and NS indicating not significant. Genotypes of the embryo groups are listed at the bottom of each plot. **g** Subsetting of gene lists from four different pairwise comparisons. The subsets are labelled 1-14 and the genes from **c-f** labelled at the top of the groups they belong to. Groups 1, 3 and 5 have grey boxes around their overlapping groups. **h** ZFA enrichment was carried out on all 14 subsets but only returned significant enrichment for groups 1-8. The  $\log_{10}$ [Fold Enrichment] is designated by the size of the circle and the colour represents  $-\log_{10}$ [p-value]. Grey bars correspond to the same subsets in **g**. Anatomy terms have been manually organised based on the themes to the right. The actual terms have been cropped and placed in (Supplemental figure 3 ZFA Enrichment) for ease of reading.

## 302 Identifying genes required for *tfap2a*;*tfap2c* knockout compensation

303 The 3' tag sequencing analysis had highlighted that both *tfap2a*<sup>-/-</sup>;*tfap2c*<sup>-/-</sup> and *tfap2a*<sup>-/-</sup>;*tfap2c*<sup>+/-</sup>  
304 gave the most extensive molecular phenotypes, but *tfap2a*<sup>-/-</sup>;*tfap2c*<sup>+/-</sup> were morphologically  
305 indistinguishable from wild-type siblings at 15 somites whereas *tfap2a*<sup>-/-</sup>;*tfap2c*<sup>-/-</sup> presented  
306 obvious morphological phenotypes by that stage. Hence a single allele of *tfap2c* is sufficient  
307 to rescue the morphological *tfap2a*<sup>-/-</sup>;*tfap2c*<sup>-/-</sup> neural crest specification and differentiation  
308 phenotype despite the observed effect on the transcriptional level. We were therefore keen to  
309 understand which genes are involved and may be required for the rescue of the morphological  
310 phenotype.

311 First, we assessed expression of *tfap2c* in the RNA-seq data and found that the levels of  
312 *tfap2c* were significantly higher in *tfap2a*<sup>-/-</sup> embryos at 15 somites when compared to wild-type  
313 embryos (Fig. 4a). We then compared the sets of differentially expressed genes derived from  
314 the pairwise comparisons of wild type with *tfap2a*<sup>-/-</sup>;*tfap2c*<sup>-/-</sup> and *tfap2a*<sup>-/-</sup>;*tfap2c*<sup>+/-</sup>, respectively.  
315 The vast majority of DE genes in the *tfap2a*<sup>-/-</sup>;*tfap2c*<sup>+/-</sup> condition were also changed in the  
316 *tfap2a*<sup>-/-</sup>;*tfap2c*<sup>-/-</sup> embryos (Fig. 4b). If we consider that there is a total of four alleles between  
317 *tfap2a/c*, this demonstrates that loss of a third *tfap2a/c* allele affects the neural crest GRN,  
318 however the transcriptional changes are not sufficient to derail neural crest specification and  
319 differentiation. Crucially, this identifies a core set of *tfap2a*/*tfap2c* responding genes, separate  
320 from secondary downstream events caused by differentiation failure and tissue loss.

321 Next we dissected the full ablation response (*tfap2a*<sup>-/-</sup>;*tfap2c*<sup>-/-</sup>) using the partial ablation  
322 profiles (*tfap2a*<sup>-/-</sup>;*tfap2c*<sup>+/+</sup> and *tfap2a*<sup>-/-</sup>;*tfap2c*<sup>+/-</sup>). As a single allele of *tfap2c* is able to maintain  
323 neural crest specification we sought to identify genes that are sensitive to different levels of  
324 *tfap2c*. To this end we ran four differential gene expression (DGE) analyses: double  
325 homozygous embryos against embryos with one or two wild-type alleles of *tfap2c*, and wild-  
326 type embryos against *tfap2a*<sup>-/-</sup>;*tfap2c*<sup>-/-</sup> or *tfap2a*<sup>-/-</sup>;*tfap2c*<sup>+/-</sup>. Next we overlapped the four lists  
327 to produce 14 subsets (Fig. 4c). This identified several expression profile classes. Subset one  
328 contains genes where *tfap2a*<sup>-/-</sup>;*tfap2c*<sup>-/-</sup> knockout resulted in a mild, but significant change from  
329 wild-type siblings but there is no significant difference between *tfap2a*<sup>-/-</sup>;*tfap2c*<sup>+/+</sup> and *tfap2a*<sup>-/-</sup>  
330 ;*tfap2c*<sup>-/-</sup> or wild-type siblings, respectively, as is the case for *draxin* (Fig. 4d). For genes in  
331 subset three a complete *tfap2a*<sup>-/-</sup>;*tfap2c*<sup>-/-</sup> knockout resulted in a significant change from wild-  
332 type siblings however a single allele of *tfap2c* was sufficient to return the expression to wild-  
333 type levels. An example of this case would be *lef1* (Fig. 4e). Subset five contained genes that  
334 are only partially rescued. A single or even both wild-type alleles of *tfap2c* are unable to return  
335 expression to wild-type levels but the expression is still *significantly* different from the *tfap2a*<sup>-/-</sup>  
336 ;*tfap2c*<sup>-/-</sup> condition, as exemplified by *mmp28* (Fig. 4f). Finally, subset 7 contained genes that  
337 are only rescued by two alleles of *tfap2c*, such as *krt222* (Fig. 4g).

### 338 **ZFA enrichment confirms specific neural crest signatures**

339 We carried out ZFA enrichment on all 14 gene subset lists and obtained significant  
340 enrichments for subsets 1-8 (Fig. 4h, Supplemental Fig. 3). Subset three, the genes fully  
341 rescued by either one or two alleles of *tfap2c*, showed the strongest enrichment for terms  
342 associated with the neural crest, head and cranial crest and also fin. While fin enrichment may  
343 seem nonsensical for a 15 somite embryo this is due to the fact that many genes annotated  
344 for fin development are also involved in craniofacial development. A similar enrichment profile  
345 resulted from subset five, the genes where either one or two alleles of *tfap2c* rescued  
346 expression levels to a significant extent, but not completely. By contrast, the two largest  
347 subsets, containing genes that change in double homozygous embryos with respect to wild

348 types, but not compared to *tfap2a*<sup>-/-</sup>;*tfapc*<sup>+/-</sup>, showed a bias towards nervous system and  
349 ectoderm enrichment. Crucially, subsets six and seven with genes that failed to be rescued  
350 by either one or two *tfap2c* alleles, had no or very little neural crest enrichment. This suggests  
351 these genes represent *tfap2a* targets outside of neural crest differentiation.

352 Taken together the enrichment analysis breaks down the full *tfap2a/tfap2c* knockout response  
353 into separate expression classes with different functional profiles. Subsets three and five  
354 contain genes that are fully or partially rescued by *tfap2c*, show the strongest neural crest  
355 enrichment and are thus most likely to represent the core of the *tfap2* neural crest GRN.

### 356 **Markov clustering reveals widespread haplotype-specific gene expression**

357 Next we applied an expression correlation network and Markov clustering approach using  
358 Biolayout *Express*<sup>3D</sup> [55,56] to identify co-expression profiles independent from condition-  
359 driven differential expression analysis. We constructed a network graph with genes as nodes  
360 and their Pearson correlation as edges from the *tfap2a;tfap2c* RNA-Seq dataset and used  
361 Markov clustering (MCL) to divide the network into discrete sets of co-expressed genes. This  
362 identified *tfap2a* and *tfap2c*-specific components (Fig. 5a) within the larger co-expression  
363 network. The majority of the network clusters was dominated by co-expression groups of  
364 genes that share a genomic locus (Fig. 5a' and Supplemental Fig 4). This is most likely driven  
365 by haplotype-specific expression which is extensively documented and studied in tissue- or  
366 cell-specific RNA-Seq data, but not in a whole organism context [57,58]. This suggests that  
367 the high genetic variability in zebrafish has a direct and widespread bearing on gene  
368 expression levels. In DGE analyses where homozygous mutants are compared to siblings  
369 haplotype-specific expression can lead to an enrichment of DE genes on the same  
370 chromosome as the mutation. Examples of such regions on chromosome 24, close to *tfap2a*,  
371 as well as on chromosomes 15 and 16, can be found in Supplemental Figure 4. We also  
372 identified the same phenomenon when analysing early time points in *sox10*, *mitfa* and *yap1*  
373 mutants (Figure 1j) where the majority of changing genes were on the same chromosome as

374 the mutant being investigated. We have previously also noted the same effect across many  
 375 different mutations and sequencing platforms.

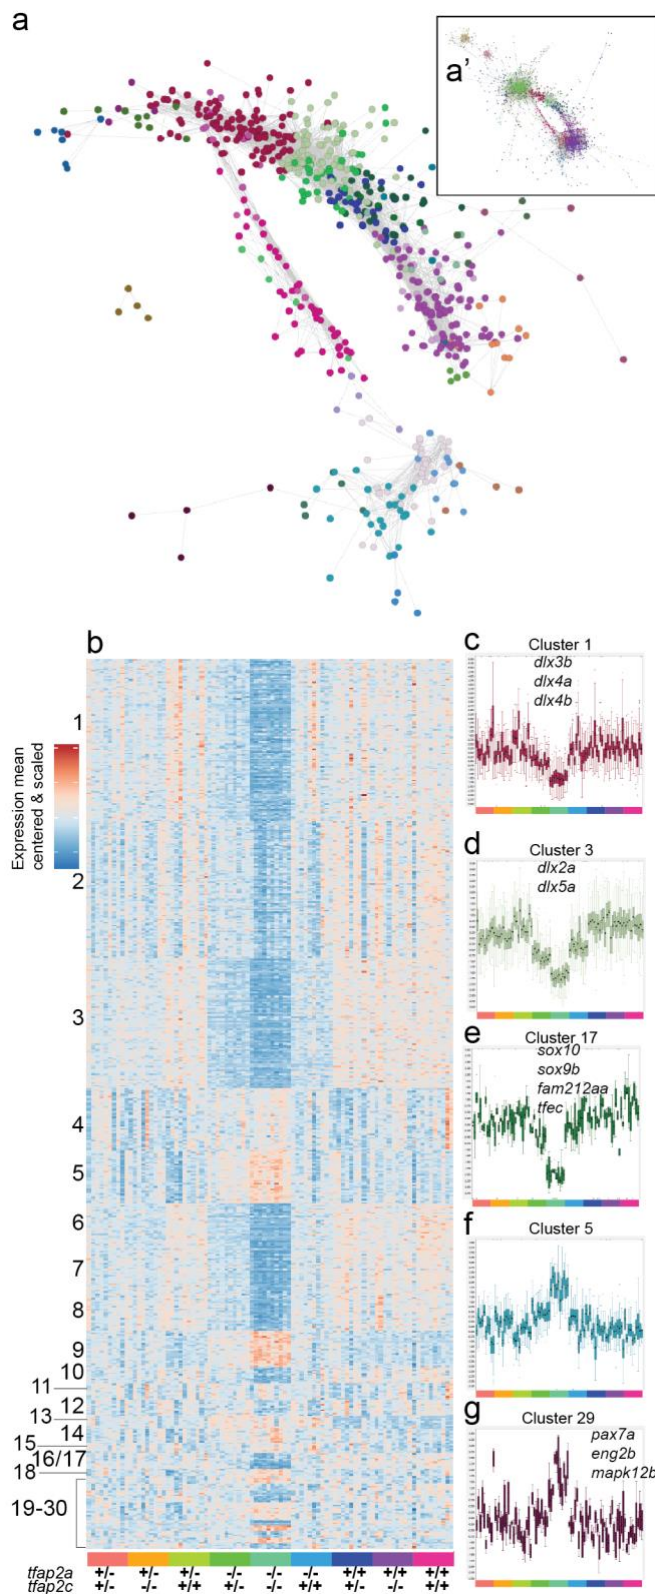

**Figure 5 Network analysis and Markov clustering of RNA-Seq 15 somite data set.**

**a** Interaction network analysis of entire RNA-Seq 15 somite (0.7 Pearson correlation) data set represented as a subset. The entire interaction network can be found in **a'**. Each node represents a single gene and its colour corresponds to its cluster group. **b** A heatmap representing 24 MCL network clusters organised by cluster size and by genotype at the bottom. **c-g** Examples of individual clusters displayed as boxplots of the values for all the genes in the cluster (mean centered and variance scaled). Samples are arranged as in **b** and are colour coded at the bottom of each cluster. Cluster number corresponds to the same cluster in **b**. Some genes contained in clusters are labelled on the plot.

376

### 377 ***tfap2a*- and *tfap2c*-specific gene clusters**

378 Using MCL clustering we identified 30 clusters containing a total of 600 genes that were driven  
379 by changes in the *tfap2a* or *tfap2c* genotypes and organised the clusters into a mean centred  
380 and scaled heatmap (Fig. 5b). It is important to point out that in the previous analysis we  
381 compared lists derived from pairwise DGE comparisons, whereas MCL clusters all expressed  
382 genes based on their expression similarity across all samples. Therefore, these clusters might  
383 exclude genes that are identified in the DESeq2 analysis because of low expression  
384 correlation with other genes, but also include highly correlated genes which did not produce a  
385 significant adjusted p-value in the DESeq2 analysis.

386 The unsupervised clustering confirmed the strong signal in the double homozygous fish  
387 (clusters one and two) and dose-dependent compensation by *tfap2c* (cluster three). However,  
388 in addition it provided increased functional resolution. For example, cluster 17 (Fig. 5e) was  
389 highly specific to neural crest effectors containing the *soxE* paralogues *sox10* and *sox9b*, the  
390 microphthalmia bHLH transcription factor *tfec* as well as the Pak4 kinase inhibitor *fam212aa* in  
391 addition to one uncharacterised gene (*si:ch211-243g18.2; ENSDARG00000044261*).

392 The differentiation of the neural crest also requires the down-regulation of specific groups of  
393 genes, for example to repress a neural fate. Cluster five (Fig. 5f) contains a collection of *soxB*  
394 family genes (*sox3*, *sox19a*, *sox19b*, *sox21b*), one of which (*Sox19*) being one of the earliest  
395 CNS markers in vertebrates [48]. Cluster five also includes another example of paralogues of  
396 *oct*-related transcription factors *pou3f2b* (*Oct-2*) and *pou3f3a*, which are associated with  
397 controlling CNS development. Cluster 29 (Fig. 5g) contains a collection of genes (*pax7a*,  
398 *eng2b*, *mapk12b* and *enfa2a*) which, based on the midbrain/hindbrain expression patterns of  
399 *pax7a* and *eng2b*, also suggests a developmental CNS role. All gene lists of individual clusters  
400 along with GO and ZFA enrichments can be found here (Table 1).

401 Using many replicates of single, genotyped, embryos from the same clutch has allowed us to  
402 identify haplotype-specific signals on a genome-wide scale. With a single allele of *tfap2c*

403 sufficient to maintain a minimal neural crest GRN, we have compiled functional subsets of  
404 maintained genes, many of which are still poorly described and previously have never been  
405 associated with the neural crest. We have identified multiple cases where gene families or  
406 paralogues behave in the same manner, highlighting more potential examples of the  
407 compensatory nature of the GRN in general. To validate the association of novel genes with  
408 neural crest biology, we next analysed a set of candidates using a knockout approach.

#### 409 **Validation of novel neural crest transcripts**

410 We have identified a large number of novel neural crest candidate genes with poor or no  
411 functional annotation (Table 1). To validate a subset of these, we analysed the expression  
412 patterns or knockout phenotypes in zebrafish embryos. *wu:fc46h12*; *ENSDARG00000114516*  
413 transcripts were strongly reduced in a number of *sox10* mutant experiments (Table 1). To  
414 analyse where in the embryo *wu:fc46h12* is expressed, we performed *in situ* hybridisation on  
415 24 hpf and 48 hpf wild-type and *sox10* mutant embryos. As a positive control for neural crest  
416 and xanthophores we included *in situ* hybridisation of *gch2*. At 24 hpf *wu:fc46h12* has an  
417 identical expression pattern to *gch2* in both wild-type and *sox10* mutants (Fig. 6a-d,g-h). At 48  
418 hpf the expression of *wu:fc46h12* and *gch2* begins to diverge in wild types as *wu:fc46h12*'s  
419 expression domain becomes more specific to a ventral crest population (Fig. 6e-f), heart and  
420 dorsal aorta (Fig. 6e'-f'). The majority of these expression domains are also lost at 48 hpf in  
421 *sox10* mutants (Fig. 6g-h). We then created a CRISPR/Cas9 *wu:fc46h12*<sup>sa30572</sup>, but observed  
422 no obvious phenotype in homozygous embryos and raised homozygotes to adulthood. We  
423 carried out intercrosses of homozygous females with heterozygous males and observed heart  
424 oedema in maternal-zygotic (MZ) mutant *wu:fc46h12* embryos (Fig. 6i-j) but most larvae  
425 recovered and form swim bladders by 5 dpf.

426 Two genes, *akr1b1* and *cax1* were both differentially expressed in the *tfap2a;tfap2c* and *sox10*  
427 data sets (Table 1). Using CRISPR/Cas9 we created a premature stop in *akr1b1*<sup>sa30579</sup>.  
428 Homozygous *akr1b1*<sup>sa30579</sup> fish develop normally but presented pale xanthophores (Fig. 6k).



429 A premature stop in *cax1* was already available from the Zebrafish Mutation Project. The  
 430 *cax1*<sup>sa10712</sup> allele presents a dulling in the colouring of xanthophores (Fig. 6l) as well as a  
 431 rounding up of the cell morphology where typically xanthophores are highly dendritic.  
 432 Homozygous *cax1*<sup>sa10712</sup> adults are viable and fertile, but MZ*cax1*<sup>sa10712</sup> embryos fail to develop  
 433 normally beyond the start of somitogenesis pointing to a role of *cax1* during early embryonic  
 434 development (Supplemental Fig. 5).

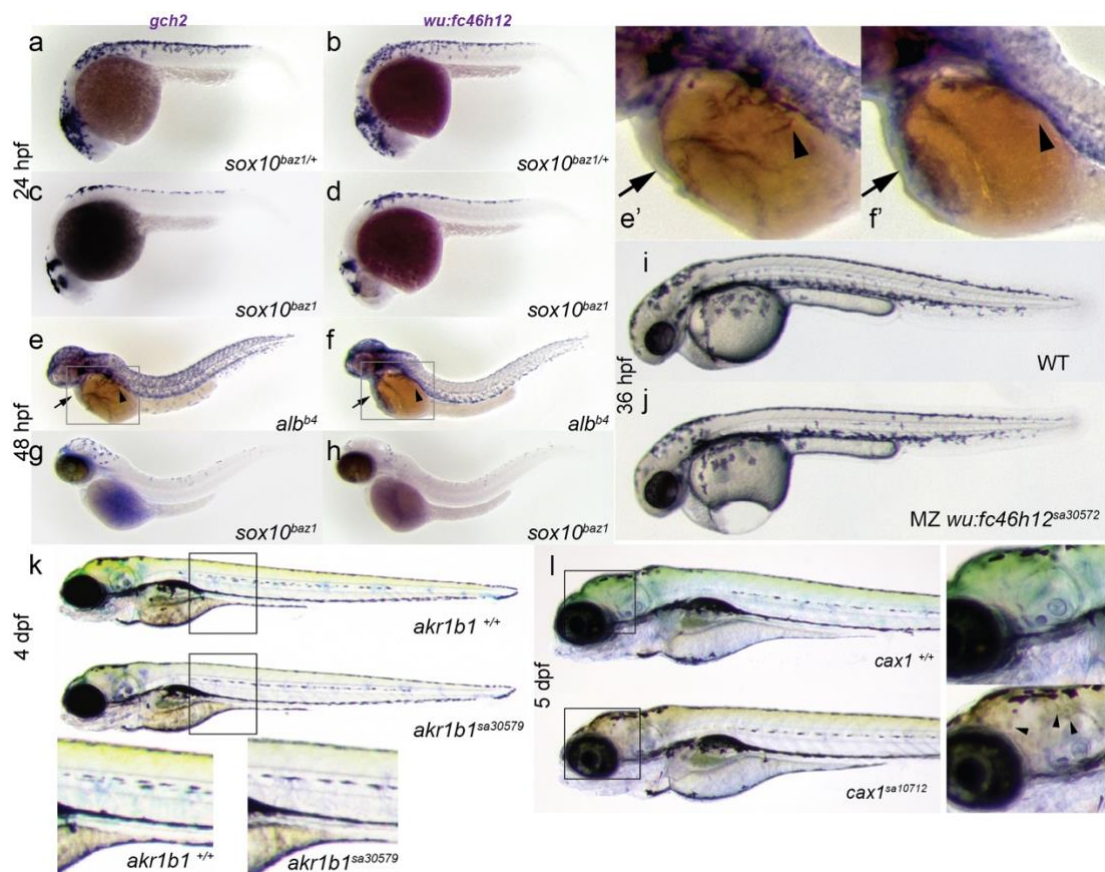

**Figure 6 Functional analysis of pigment cell specific genes.**

**a-h** Whole mount *in situ* analysis of *wu:fc46h12* and *gch2* as a pigment cell comparison. *sox10*<sup>baz1/+</sup> heterozygotes embryos as sibling controls **a-b** and mutant *sox10*<sup>baz1</sup> embryos at 24 hpf **c-d**. At 48 hpf *in situ* were carried out on *albino* embryos to serve as wild-type controls **e-f** with arrows indicating the heart and arrow heads the dorsal aorta. A blow up of this region can be found in **e'-f'**. **g-h** Expression of *gch2* and *wu:fc46h12* at 48 hpf in *sox10*<sup>baz1</sup> mutants. **i-j** Wild-type and MZ*wu:fc46h12*<sup>sa30587</sup> embryos at 36 hpf with oedema around the forming heart **j**. **k** Wild-type sibling and mutant *akr1b1*<sup>sa30579</sup> at 4 dpf with mutant larvae presenting a reduction of yellow colour produced by xanthophores. Magnifications indicated with a black box. **l** Wild-type sibling and mutant *cax1*<sup>sa10712</sup> larvae at 5 dpf. Close ups indicated by black boxes around the head show dull yellow colour and abnormal cell morphology in mutants (arrowhead).

435

## 436 **A role for the Hippo signalling pathway in the neural crest**

437 Expression of the transcriptional regulator *yap1* was reduced in double homozygous embryos  
438 in our 4 somite *tfap2a;tfap2c* 3' tag sequencing data (Table1) and *yap1* was also enriched in  
439 neural crest FACS-sorted cells (Figure 2e). In light of this, we assessed the DE gene lists in  
440 the *tfap2a;tfap2c* knockout versus wild-type sibling comparison from the RNA-Seq data set at  
441 15 somites and found that three members of the Hippo signalling pathway *fat2*, *lats2* and *yap1*,  
442 had significant negative log<sub>2</sub> fold-changes (Fig. 7a). These data suggested a role for Hippo  
443 signalling in neural crest cells.

## 444 ***yap1* knockouts are temperature sensitive, homozygous viable and reduced in body** 445 **size**

446 To confirm a possible role for *yap1* in neural crest we targeted the first exon of *yap1* using  
447 CRISPR/Cas9 and created two alleles, *yap1*<sup>sa25458</sup> and *yap1*<sup>sa25474</sup>, leading to frame shifts and  
448 premature stops (Fig. 7b). When heterozygous carriers for either *yap1*<sup>sa25458</sup> or *yap1*<sup>sa25474</sup> were  
449 intercrossed and embryos raised at 28.5°C we were able to identify the previously described  
450 ocular phenotypes at 48-72 hpf in approximately 25% of embryos [59], albeit with variable  
451 penetrance depending on incubator temperature. Due to this observation, we tested whether  
452 these two *yap1* mutants were temperature sensitive. We split embryos from a single clutch  
453 and raised half at 24°C and the other half at 31.5°C. We then genotyped all fish which had  
454 formed a swim bladder by 5 dpf as larvae which fail to form a swim bladder by this time are  
455 not viable. Just over 20% of homozygous *yap1* mutant larvae formed a swim bladder when  
456 raised at 24°C but when raised at 31.5°C none of the homozygous *yap1* larvae formed a swim  
457 bladder (Fig. 7c).

458 To investigate whether fish raised at permissive temperature of 24°C were viable to adulthood,  
459 we raised intercrosses of *yap1* carriers for each allele (*yap1*<sup>sa25458</sup> & *yap1*<sup>sa25474</sup>) until 5 dpf  
460 then transferred them to our standard fish nursery. At 2 months post fertilisation, we observed  
461 that a subset of these fish were smaller than their siblings (Fig. 7d). We measured and

462 genotyped intercrosses from both *yap1* alleles and confirmed that *yap1* homozygous fish were  
 463 indeed smaller than their wild-type siblings (Fig. 7e).

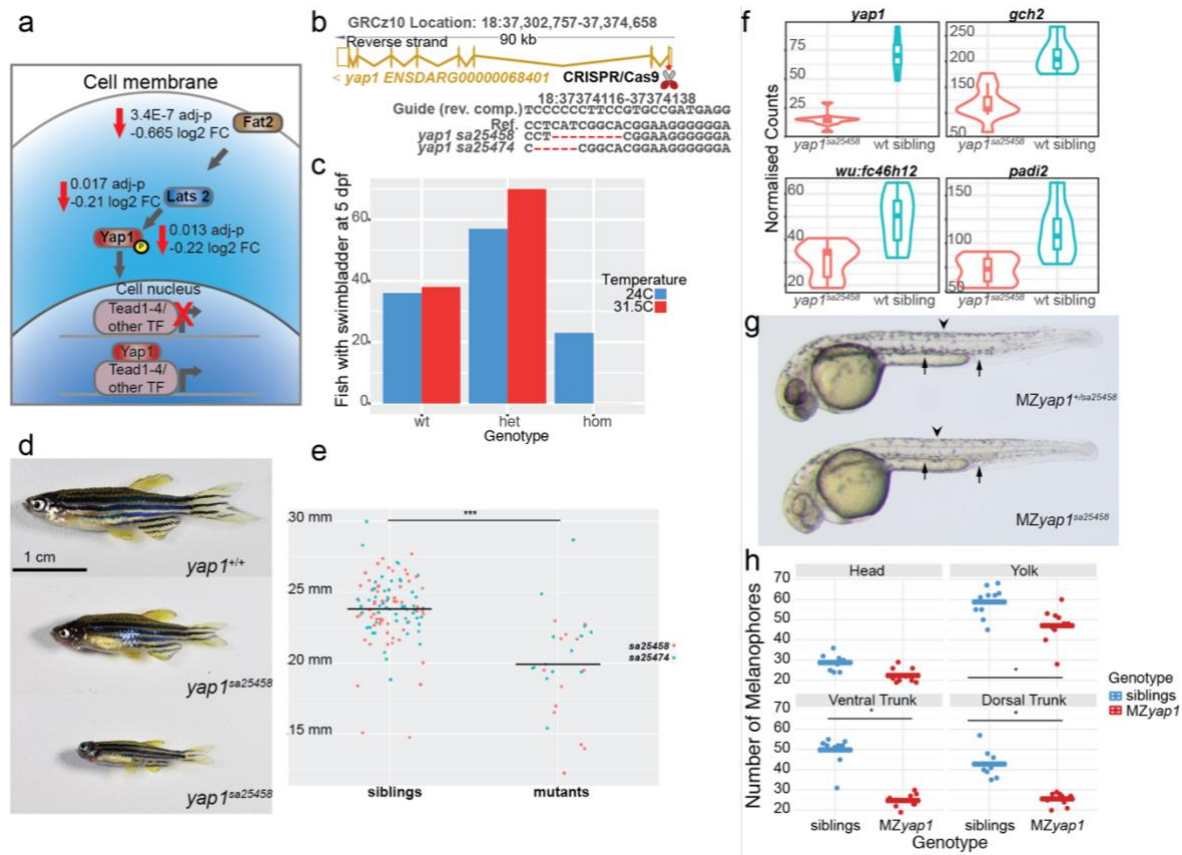

**Figure 7 *yap1* mutants are temperature sensitive and play a role in melanocyte development.**

**a** Transcripts of members of the Hippo signalling pathway *fat2*, *lats2* and *yap1* were less abundant in *tfap2a;tfap2c* mutants when compared to wild-type siblings. A schematic showing their role in signal transduction and transcription inside of a cell. **b** Using CRISPR/Cas9 mutations were made in the first exon of *yap1* leading to the two alleles described. The exon-intron structure of the *yap1* transcript is shown in gold. The exact deletions are displayed below. **c** Embryos from a single clutch were split and raised at 24C and 31.5C with bars indicating the number of fish forming a swim bladder at 5 dpf grouped by *yap1*<sup>sa25458</sup> genotypes. **d** Homozygous *yap1* mutants are viable but present with a variation in size. **e** Quantification of size at two months of age with the corresponding genotypes for both *yap1* alleles. A statistically significant difference of <0.05 is indicated by “\*”. **f** Normalised counts of 3' tag sequencing data at 24 hpf comparing *yap1*<sup>sa25458</sup> mutants to wild-type siblings. All four genes, *yap1*, *gch2*, *wu:fc46h12* and *padi2* - have an adj. p-value <0.05. **g** Maternal zygotic *yap1* mutants present a strong reduction in melanocyte numbers at 36 hpf at both dorsal (arrow head) and ventral tail regions (arrow). **h** Quantification of melanocytes with the quantities on the left and then broken down into the regions of the head, yolk, ventral tail and dorsal tail. Each dot represents a region in a single larva, siblings in blue and MZ*yap1*<sup>sa25458</sup> in red. A statistical significance of <0.05 is indicated with “\*”.

464

## 465 **Zygotic *yap1* mutants show signs of neural crest GRN disruption**

466 Although zygotic *yap1* mutants did not display obvious morphological phenotypes in neural  
467 crest cell types, we investigated whether there was a neural crest GRN phenotype by using a  
468 transcriptomic approach. We intercrossed *yap1*<sup>sa25458</sup> carriers, raised them at standard  
469 conditions of 28.5°C and collected embryos for 3' tag sequencing at 4 somites, 15 somites  
470 and 24 hpf. The transcriptome profiles were normal at 4 somite and 15 somite stages, with the  
471 majority of the changed genes on the same chromosome as *yap1* (Figure 1j, Table 1).  
472 However, at 24 hpf the early xanthophore pigment cell marker *gch2* was significantly reduced  
473 in *yap1* mutants as well as *wu:fc46h12*, the newly identified pigment marker described above  
474 (Figure 7a-j). Interestingly, the early epidermis marker *padi2* was also reduced in *yap1* mutants  
475 (Fig. 7f).

## 476 **Loss of maternal *yap1* mRNA causes reduced melanocyte numbers at 30 hpf**

477 Previous studies have shown a role for *yap1* in very early development of both zebrafish and  
478 medaka [60–62]. In zebrafish, this precedes zygotic genome activation and thus highlights a  
479 role for maternally deposited transcripts. The developmental time course data of *yap1*  
480 expression confirmed high levels of maternally deposited polyadenylated *yap1* (E-ERAD-475,  
481 [www.ebi.ac.uk/gxa/home/](http://www.ebi.ac.uk/gxa/home/)).

482 Given the maternal deposition of *yap1* transcripts in the egg, we crossed heterozygous male  
483 *yap1*<sup>+/sa25458</sup> carriers to homozygous female *yap1*<sup>sa25458</sup> fish and evaluated the resulting  
484 MZ*yap1*<sup>sa25458</sup> larvae at the restrictive temperature of 31.5°C. At approximately 30 hpf we  
485 observed a strong reduction in the number of melanocytes present in roughly half of the  
486 embryos. The previously described ocular phenotype [59] was also apparent in addition to a  
487 mild pericardial oedema (Fig. 5g). It is important to note that these larvae are otherwise  
488 morphologically stage matched. To confirm and quantify the melanocyte reduction we counted  
489 the number of melanocytes in four different sections; head, yolk, ventral trunk and dorsal trunk  
490 - of each larva and then genotyped them. A significant melanocyte reduction of about 50% in

491 the yolk, ventral tail and dorsal tail was found with no major difference in the number of  
492 melanocytes in the head (Fig. 7h). This demonstrates that maternally deposited mRNA is able  
493 to rescue a melanocyte phenotype at 30 hpf further highlighting the very early induction of the  
494 neural crest GRN.

495

## 496 **Discussion**

497 We have used transcriptional profiling on mutants affecting different steps of neural crest  
498 specification and differentiation to dissect the zebrafish neural crest GRN. We have used 3'  
499 tag sequencing as a first pass screening method to then hone in with more detailed RNA-Seq.  
500 To make our data easily accessible to the research community we have placed the  
501 *tfap2a;tfap2c* 15 somite RNA-Seq experiment into Expression Atlas ([www.ebi.ac.uk/gxa/home](http://www.ebi.ac.uk/gxa/home)  
502 [experiment E-MTAB-6106](http://www.ebi.ac.uk/gxa/home/experiment/E-MTAB-6106)) for browsing and downloading and it will be made available with  
503 the next Expression Atlas release. The analysis of genotyped single embryos, independent  
504 from a visible phenotype, has allowed us to separate transcriptional responses from  
505 morphological outcomes. This approach is complementary to cell type-specific assays which  
506 require tissue manipulation and/or dissociation, much like the neural crest FACS RNA-Seq  
507 data set described here. Recently, elegant approaches have been developed to biotag specific  
508 cells *in vivo* and isolate their nuclei for further processing [63]. However, currently these  
509 methods require the pooling of embryos which would be challenging to apply to non-  
510 phenotypic embryos in loss of function analyses.

### 511 **Initiation of neural crest GRN before gastrulation, shortly following zygotic genome** 512 **activation**

513 The neural crest is typically described as being induced at the lateral edges of the neural plate  
514 after gastrulation. However, using wild-type developmental time course data we can place the  
515 activation of the neural crest transcription factors *tfap2a*, *tfap2c* and *foxd3* at the Dome stage,

516 which follows zygotic genome activation and precedes gastrulation. In zebrafish, simultaneous  
517 loss of *tfap2a* and *foxd3* has been shown to genetically ablate the neural crest [64,65] with  
518 *tfap2a* and *foxd3* expressed in mutually exclusive compartments of the embryo at the shield  
519 stage, mid-way through gastrulation. The overlap of these expression domains forms the  
520 presumptive neural crest [65]. Recently in *Xenopus laevis* it has been shown that a high  
521 degree of overlap exists in the blastula pluripotent GRN and the neural crest GRN with the  
522 neural crest retaining the pluripotency of cells in the blastula stage rather than being induced  
523 later on in development [66]. Interestingly, the activation of the neural crest marker *crestin* also  
524 coincides with the Dome stage (E-ERAD-475, [www.ebi.ac.uk/gxa/home/](http://www.ebi.ac.uk/gxa/home/)). This suggests that  
525 the establishment of the neural crest GRN, as it assumes its identity following blastula stages,  
526 shortly follows zygotic genome activation and places its initiation much earlier than previously  
527 shown in zebrafish and other vertebrates. This also raises the possibility of maternal mRNAs  
528 playing a larger role than previously thought in early neural crest initiation.

#### 529 **Genetic ablation of the neural crest**

530 In addition to *tfap2a;foxd3* loss of function a combined knockout of *tfap2a* and *tfap2c*  
531 genetically ablates the neural crest in zebrafish [15,65]. In the case of *tfap2a;foxd3*, *tfap2a* is  
532 thought to have an activator function whereas *foxd3* has been shown to act both as a repressor  
533 and an activator [67]. Knockouts of *tfap2a* fail to form normal jaws and have reduced numbers  
534 of melanocytes but still form neural crest cells. On a transcriptional level using 3' tag  
535 sequencing, the number of genes which are differentially abundant in the *tfap2a* or *tfap2c*  
536 mutants alone are modest, 39 and 5 genes respectively at the 15 somite stage (Fig. 2d). At  
537 the 4 somite stage *tfap2c* acts in a compensatory manner as its overall abundance is  
538 increased by almost 50% in *tfap2a*<sup>-/-</sup> embryos (Fig. 2b and Fig 5a). By removing a single *tfap2c*  
539 allele in *tfap2a*<sup>-/-</sup> embryos the number of changing genes jumps from 39 to 1152 (Fig. 2d),  
540 although this extensive change of gene expression is marked morphologically only with a mild  
541 decrease in the numbers of melanocytes in the tail at a much later stage. Using RNA-Seq at  
542 the 15 somite stage increases the total numbers of changing genes detected but the general

543 trends remain much the same. *tfap2* family proteins are thought to form both homodimers as  
544 well as heterodimers [68]. This stepwise genetic ablation implies that *tfap2c* does not require  
545 *tfap2a* to initiate the early neural crest GRN and that either homodimers of *tfap2c* alone or  
546 potentially heterodimers with other *tfap2* family members are sufficient; however we do not  
547 see upregulation of any other *tfap2* genes.

#### 548 **Dissection of the neural crest transcriptional network**

549 *tfap2a* has been shown to play a role in the early stages of neural crest as well as the  
550 development of the epidermis. Both of these tissues arise at similar time points from ectoderm,  
551 and it is therefore crucial to separate the neural crest from the ectoderm signal. By combining  
552 multiple mutant data sets over developmental time along with the neural crest FACS data set  
553 we were able to establish the timing of when different levels of the neural crest GRN begin.  
554 Along with a large number of known downstream targets the subsets contain many  
555 uncharacterised genes, suggesting a role for these in pigmentation. We can further group  
556 genes which are more likely to not be specific to the neural crest but rather involved in  
557 epidermis development (Fig. 2e). Using the overlaps across the three different time points we  
558 have classified groups of genes from an “early” role to “mid” and then “later.” We have also  
559 further characterised trunk neural crest and melanocytes-specific downstream targets by  
560 analysing *sox10* and *mitfa* knockouts.

#### 561 **Neural crest identity requires repression of a neural fate**

562 The 15 somite stage had the highest number of differentially expressed genes in the  
563 *tfap2a;tfap2c* loss of function model and therefore we chose to investigate this stage in more  
564 detail using RNA-Seq. Using different subsetting approaches we have characterised distinct  
565 groups of neural crest genes and also have identified the core neural crest GRN that is  
566 maintained via *tfap2c*. The hierarchical clustered heatmap (Supplemental Figure 2e) highlights  
567 an enrichment of neural genes which are increased in the mutant samples. Considering the  
568 emerging model that neural crest cells are not actually induced *in situ* but rather a refinement

569 of pluripotent blastula cells [66], our data support the notion that not only is the activation of  
570 the neural crest GRN important but also the repression of non-neural crest specific GRNs.

### 571 **Compensation of *tfap2a* knockout phenotypes via *tfap2c* and identification of genes** 572 **involved in the neural crest rescue**

573 RNA-Seq analysis of *tfap2a;tfap2c* knockouts and their siblings revealed an increase of *tfap2c*  
574 mRNA expression in *tfap2a* mutants at 15 somites. Although not addressed in this study, an  
575 interesting question now is: what is the molecular machinery which identifies the need for  
576 genetic compensation and how is it carried out? We find that whereas a single allele of *tfap2c*  
577 is able to rescue the early morphological neural crest ablation phenotype the expression of a  
578 core set of downstream effectors cannot be restored to wild-type levels. This separates the  
579 morphological phenotype, and its secondary molecular effects, from the primary gene-  
580 regulatory effect of *tfap2* loss of function. We have used this differential behaviour of  
581 downstream targets to identify genes which *tfap2c* is able to return to wild-type levels or to  
582 only partially rescue from the *tfap2a/c* double knockout. This confirmed known neural crest  
583 players but also added new genes to the neural crest GRN. The genes in subsets three and  
584 five (Fig. 4c-g) represent a core set of 371 and 162 genes, respectively, of the neural crest  
585 GRN required for early neural crest initiation and are most likely to be of high developmental  
586 and evolutionary importance.

### 587 **Genetic compensation via paralogues**

588 Humans are particularly susceptible to haploinsufficient mutations in a number of neural crest-  
589 specific genes, including *sox10*, leading to Waardenburg syndrome or Hirschsprung disease,  
590 whereas the case in zebrafish seems to be different [69]. *sox10*<sup>+/-</sup> fish are adult viable and are  
591 phenotypically normal. Based on the developmental timing and clustering behaviour of the  
592 *soxE* family paralogues *sox10* and *sox9b*, there is a good probability that these two genes are  
593 able to compensate for each other in early neural crest cells. Similarly, fish with mutations in  
594 *tfap2c* are homozygous viable and *tfap2a*<sup>+/-</sup>;*tfap2c*<sup>-/-</sup> fish are indistinguishable from their wild-



595 type siblings. By contrast, heterozygous mutations and alterations of *TFAP2A* lead to a  
596 number of developmental phenotypes in humans.

597 Previously, we and others have shown that the majority of mutations fail lead to an obvious  
598 morphological phenotype in the first 5 days of development in zebrafish [41,70]. Here, using  
599 the neural crest as a model we dissect the relationship between transcriptional robustness  
600 and morphological outcomes. Our study has also begun to reveal more evidence of genetic  
601 compensation in other paralogous genes. Unsupervised clustering has highlighted that entire  
602 gene families clustered together across development [44] and behaved in a similar manner in  
603 different genetic combinations in the *tfap2a;tfap2c* loss of function experiments (Figure 5b-e.  
604 Table 1).

605 Another example of possible paralogous compensation can be observed in the relatively mild  
606 developmental phenotypes of the *yap1* knockouts. Recently double knockouts of *yap1* and *taz*  
607 (*wwtr1*), its paralogue, have shown much stronger early developmental phenotypes and are  
608 embryonic lethal [61]. A deeper understanding of genetic and functional paralogues with  
609 respect to mutual compensation versus division of function will provide mechanistic insight  
610 into gene function evolution.

#### 611 **Identification of haplotype-specific signals**

612 Use of high replicate genotyped samples has revealed an enrichment of differentially  
613 expressed genes on the chromosome carrying the mutation in the analysis of *sox10*, *mitfa* and  
614 *yap1* mutants (Figure 1j, Table1). This is most likely driven by stretches of homozygosity for  
615 the background linked to the mutation which produce different expression levels than the  
616 corresponding genomic loci in the control siblings. It is highly possible that some of these  
617 transcriptional differences could also have an effect on phenotypic outcomes of the mutation  
618 in question and could contribute to differences occasionally noted when a mutation is crossed  
619 into a different genetic background [71]. The differences in the haplotype-specific signals in  
620 the 4 somites and 24 hpf *mitfa* experiment also emphasise that additional factors such as

621 stage and chromatin availability may be playing important roles. We can further demonstrate  
622 this effect on a genome-wide scale by increasing the total number of samples tested, as in the  
623 *tfap2a;tfap2c* 15 somite RNA-Seq experiment and allowing samples to cluster independently.  
624 In this analysis, we have identified groups of co-localised genes behaving in a similar manner  
625 on chromosomes other than the one carrying the mutation of interest. Although these clusters  
626 of genes are typically close to each other, the overall regions can span several hundred genes.

## 627 **A role for Hippo signalling in the neural crest**

628 We have identified a reduction in the abundance of some Hippo signalling members in both  
629 our 3' tag sequencing and RNA-Seq data sets. Previously, a role for Hippo signalling has been  
630 suggested in the neural crest using conditional mouse knockout models and in cell culture  
631 [72–74]. However, in the case of the mouse, complete *yap1* knockouts are not viable and in  
632 human iPS neural crest cell models both *YAP1* and *TAZ(WWTR)* require modulation. In  
633 zebrafish we show a role for maternally deposited *yap1* in the differentiation of melanocytes,  
634 however the effect on other neural crest subtypes remains to be investigated. Over the past  
635 few years post-embryonic neural crest stem cells have been identified in mouse and zebrafish  
636 [27,75,76]. The temperature sensitive *yap1* signalling model described here allows for the  
637 conditional inactivation of Hippo signalling and therefore the investigation of post-embryonic  
638 neural crest stem cells as well as other Hippo-dependent processes such as growth, pattern  
639 formation and regeneration later in development and in adults.

## 640 **Conclusions**

641 Taken together, we have used transcriptional profiling and stepwise genetic ablation of the  
642 neural crest to divide the neural crest GRN into temporal and functional units containing new  
643 candidate genes alongside well known factors. The analysis of paralogue compensation  
644 separates the morphological neural crest ablation phenotype from the first expression  
645 changes to the core *tfap2* GRN. We confirm association of previously uncharacterised genes  
646 through knockout experiments and demonstrate a role of maternal transcripts in pigment cell

647 development. Future studies of the functional gene clusters described here will help to further  
648 refine their role in neural crest development as well as their involvement in human genetic  
649 disorders and diseases such as neuroblastoma and melanoma.

## 650 **Materials and Methods**

### 651 **Zebrafish Husbandry and Phenotyping of Mutants**

652 Zebrafish were maintained at 23.5°C on a 14h light/10h dark cycle. Male and female zebrafish  
653 from genotyped heterozygous fish carrying mutations were separated overnight before letting  
654 them spawn naturally the next day. Fertilised eggs were grown at 28°C and single or multi-  
655 allelic phenotyping was carried out as previously described [41,77]. The *sox10<sup>Δ3</sup>* and *sox10<sup>Δbaz1</sup>*  
656 alleles were a gift from Robert Kelsh and *mitfa<sup>w2</sup>* was previously a gift from Jim Lister [25,50].

### 657 **Embryo Collection**

658 Embryos were either morphologically sorted into phenotypically abnormal and normal  
659 (*sox10<sup>Δ3/baz1</sup>* and collected at 28hpf, 36hpf and 48hpf) or collected blind at the stage of interest.  
660 Single embryos were placed individually into a well of a 2ml deep well block (Axygen, Cat  
661 number P-DW-20-C-S), snap frozen on dry ice and then stored at -80C.

### 662 **FACS**

663 22-23 hpf embryos were collected from the zebrafish transgenic *sox10:mg* line which labels  
664 neural crest nuclei with mCherry and crest cell membranes with GFP. Dissociated cells were  
665 collected for FACS as previously described (Manoli et al., 2012). Briefly, embryos were  
666 dechorionated using 33 mg/ml pronase (Sigma) and pooled either as whole embryos or as  
667 pools of heads and tails. The yolks were removed using deyolking buffer (55 mM NaCl, 1.8  
668 mM KCl, 1.25 mM NaHCO<sub>3</sub>) followed by digestion with trypsin-EDTA. Finally, the pellet was  
669 resuspended in FACSmax Cell Dissociation solution (AMS Biotechnology) and dissociated  
670 cells collected by passing the suspension through a 20 µm cell strainer (Sysmex Partec).  
671 Using appropriate gating, dissociated cells were sorted into mCherry positive, mCherry and

672 GFP positive and unlabelled non-crest cells on the BD INFLUX. The data was analysed using  
673 FlowJo.

674 Sorted cells were collected and lysed in 110ul of RLT buffer (Qiagen) containing 1 µl of 14.3M  
675 beta mercaptoethanol (Sigma). The lysate was allowed to bind to 1.8 volumes of Agencourt  
676 RNAClean XP (Beckman Coulter) beads for 10 mins and RNA was eluted from the beads as  
677 per the manufacturer's instructions. Total RNA was converted into cDNA libraries using the  
678 SMART-Seq V4 Ultra Low Input RNA kit (Clontech) followed by Nextera DNA Library Prep kit  
679 (Illumina) as per manufacturer's instructions. Libraries were pooled and sequenced on Illumina  
680 HiSeq 2000 in 75 bp paired-end mode.

### 681 **Nucleic Acid Extraction**

682 Frozen embryos were lysed in 100 µl RLT buffer (Qiagen) containing 1 µl of 14.3M beta  
683 mercaptoethanol (Sigma). The lysate was allowed to bind to 1.8 volumes of Agencourt  
684 RNAClean XP (Beckman Coulter) beads for 10 mins. The plate was then applied to a plate  
685 magnet (Invitrogen) till the solution cleared and the supernatant was removed without  
686 disturbing the beads. While still on the magnet the beads were washed thrice with 70% ethanol  
687 and RNA was eluted from the beads as per the manufacturer's instructions. RNA was  
688 quantified using either Qubit RNA HS assay or Quant-iT RNA assay (Invitrogen).

### 689 **Genotype Confirmation**

690 Genotyping was carried out according to [42]. Briefly, 1 µl of DNA from the extracted total  
691 nucleic acid was used to confirm the genotype of each sample using KASP SNP and InDel  
692 identification assays (LGC group) designed against our allele of interest. The genotyped plates  
693 were read on a plate reader (Pherastar, BMG Labtech) and 10-12 samples per genotype were  
694 selected for making libraries.

### 695 **Transcript counting**

696 DeTCT libraries were generated as described previously [51]. Briefly, 300 ng of RNA from  
697 each genotyped sample were DNase treated, fragmented and bound to streptavidin beads.

698 The 3' ends of the fragmented RNA were pulled down using a biotinylated polyT primer. An  
699 RNA oligo containing the partial Illumina adapter 2 was ligated to the 5' end of the bound  
700 fragment. The RNA fragment was eluted and reverse transcribed using an anchored oligo dT  
701 reverse transcriptase primer containing one of the 96 unique index sequences and part of the  
702 Illumina adapter 1. The Illumina adapters were completed during a library amplification step  
703 and the libraries were quantified using either the BioPhotometer (Eppendorf) or Pherastar  
704 (BMG Labtech). This was followed by size selection for an insert size of 70-270 bases. Equal  
705 quantities of libraries for each experiment were pooled, quantified by qPCR and sequenced  
706 on either HiSeq2000 or HiSeq 2500.

707 Sequencing data were analysed as described previously [51]. Briefly, sequencing reads were  
708 processed with the DeTCT `detag_fastq.pl` script and aligned to the GRCz10 reference genome  
709 with BWA 0.5.10. The resulting BAM files were processed using the DeTCT pipeline, which  
710 results in a list of regions representing 3' ends, together with a count for each sample. These  
711 counts were used for differential expression analysis using DESeq2 on pairwise combinations  
712 of samples. Each region was associated with Ensembl 86 gene annotation based on the  
713 nearest transcript in the appropriate orientation. False positive 3' ends, representing, for  
714 example, polyA-rich regions of the genome, were filtered using the DeTCT `filter_output.pl`  
715 script with the `--strict` option, reducing the number of 3' ends from 439,367 to 53943. Gene  
716 sets were analysed using `topgo-wrapper` for GO enrichment and `Ontologizer` for ZFA  
717 enrichment.

## 718 **RNA-Seq**

719 Total nucleic acid was isolated from *tfap2a*<sup>+/*sa24445*</sup>;*tfap2c*<sup>+/*sa18857*</sup> intercrosses at 15 somites.  
720 KASP genotyping was used to identify all 9 possible genotypes. Total nucleic acid was treated  
721 with DNaseI (NEB, Catalogue number M0303L) and 10 replicates per genotype were  
722 processed. Ambion ERCC spike-in mix 2 (Cat. No. 4456740) was added to 200 ng RNA  
723 according to the manufacturer's instructions and sequencing libraries were prepared using the

724 Illumina TruSeq Stranded mRNA Sample Prep Kit. Libraries were pooled and sequenced on  
725 Illumina HiSeq 2500 in 75 bp paired-end mode.  
726 Sequencing data were assessed using FastQC and aligned to the GRCz10 reference genome  
727 and Ensembl 86 transcriptome using TopHat2. Read counts per gene were generated using  
728 htseq-count and used as input for pairwise differential expression analysis using DESeq2.  
729 Gene sets were analysed using topgo-wrapper for GO enrichment and Ontologizer for ZFA  
730 enrichment. Custom R scripts were used for hierarchical clustering and principal component  
731 analysis. Count data were also clustered using Biolayout *Express*<sup>3D</sup>.

### 732 Embryo and Fin Clip Genotyping

733 Genotyping of embryos and fin clips was performed as previously described [41,42].  
734 Previously unpublished alleles used in this study are as follows:

| 735 | Allele name                          | Pos(Assembly:Chr:Pos) | REF                      | ALT |
|-----|--------------------------------------|-----------------------|--------------------------|-----|
| 736 | <i>cax1</i> <sup>sa10712</sup>       | GRCz11:4:14984215     | T                        | A   |
| 737 | <i>tfap2c</i> <sup>sa18857</sup>     | GRCz11:6:56171775     | G                        | T   |
| 738 | <i>tfap2a</i> <sup>sa24445</sup>     | GRCz11:24:8725695     | T                        | A   |
| 739 | <i>yap1</i> <sup>sa25457</sup>       | GRCz11:18:37355128    | AT                       | A   |
| 740 | <i>yap1</i> <sup>sa25458</sup>       | GRCz11:18:37355126    | TCATCGGCA                | T   |
| 741 | <i>wu:fc46h12</i> <sup>sa30572</sup> | GRCz11:2:7638034      | ATCAGGGTGAAGGTCAGCAGCAAT | A   |
| 742 | <i>akr1b1</i> <sup>sa30578</sup>     | GRCz11:4:14901038     | GTCCGGCTACCGGCACA        | G   |
| 743 |                                      |                       |                          |     |

### 744 RNA Whole Mount *In Situ* Hybridisation

745 RNA DIG-labelled probes were generated from cDNA libraries (Transcriptor High Fidelity  
746 cDNA Synthesis Kit, Roche) covering all relevant embryonic stages. PCR was performed and  
747 then TA cloned using TOPO-TA (Invitrogen). RNA riboprobes were produced using the T7-  
748 and SP6-promoter sequence, enabling syntheses of RNA in vitro transcription of the plasmid  
749 using T7- and SP6-RNA polymerase (Roche). All oligo nucleotide sequences are listed here:

750 *wu:fc46h12\_left1*:CTGCTGACCTTCACCCTGATTCTG,  
751 *wu:fc46h12\_right1*:GGTGTATTGCCTAAAACCCTCAGC  
752 *wu:fc46h12\_left2*:ATTGCTGCTGACCTTCACCCTGAT,  
753 *wu:fc46h12\_right2*:ATTGCCTAAAACCCTCAGCTTCCA .

754 **CRISPR/Cas9**

755 Creation and identification of CRISPR/Cas9 zebrafish alleles were conducted as previously  
756 described using the zebrafish codon optimised double NLS Cas9 [78,43].

757 **Abbreviations:**

|     |       |                                            |
|-----|-------|--------------------------------------------|
| 758 | ALT   | Alternative                                |
| 759 | Chr   | Chromosome                                 |
| 760 | dpf   | days post fertilisation                    |
| 761 | DE    | Differentially Expressed                   |
| 762 | DGE   | Differential Gene Expression               |
| 763 | DeTCT | Differential Transcript Counting Technique |
| 764 | ENA   | European Nucleotide Archive                |
| 765 | ENU   | N-ethyl-N-nitrosourea                      |
| 766 | FACS  | Fluorescence-Activated Cell Sorting        |
| 767 | GFP   | Green Fluorescent Protein                  |
| 768 | GRN   | Gene Regulatory Network                    |
| 769 | hpf   | hours post fertilisation                   |
| 770 | MCL   | Markov Clustering                          |
| 771 | mut   | mutant                                     |
| 772 | MZ    | Maternal Zygotic                           |
| 773 | NC    | Neural Crest                               |
| 774 | NLS   | Nuclear Localisation Sequence              |
| 775 | PCA   | Principal Component Analysis               |
| 776 | PCR   | Polymerase Chain Reaction                  |
| 777 | REF   | Reference                                  |
| 778 | sib   | sibling                                    |
| 779 | WT    | Wild type                                  |

780 ZFA Zebrafish Anatomy Ontology

781

## 782 **Declarations**

### 783 **Ethics Approval and consent to participate**

784 Zebrafish were maintained in accordance with UK Home Office regulations, UK Animals  
785 (Scientific Procedures) Act 1986, under project licences 80/2192, 70/7606 and P597E5E82.

786 All animal work was reviewed by The Wellcome Trust Sanger Institute Ethical Review  
787 Committee.

788 Consent to participate not applicable.

### 789 **Consent for publication**

790 Not applicable

### 791 **Availability of data and material**

792 The datasets supporting the conclusions of this article are available in ENA  
793 (<https://www.ebi.ac.uk/ena>). Accessions for all sequencing can be found in the Additional File  
794 2 Data Sequence Archive Metadata.txt. DGE lists, clusters etc. described in this manuscript  
795 are deposited in a figshare collection (See Table 1 and 10.6084/m9.figshare.c.4077302).  
796 Zebrafish mutant lines will be made available upon request.

### 797 **Competing interests**

798 The authors declare that they have no competing interests

### 799 **Funding**



800 This work was supported by the Wellcome Trust [098051 and 206194]. The funding body had  
801 no role in the design of the study and collection, analysis, and interpretation of data and in  
802 writing the manuscript.

### 803 **Authors' contributions**

804 Conceptualization: CMD, EBN

805 Data curation: IMS, RJW, NW

806 Formal analysis: IMS, RJW, JEC, NW, CMD

807 Funding acquisition: DLS, EBN

808 Investigation: CMD, NW

809 Resources: DLS, EBN

810 Software: IMS, RJW

811 Supervision: EBN

812 Visualization: IMS, RJW, NW, CMD

813 Writing – original draft: CMD, EBN

814 Writing – review & editing: CMD, NW, RJW, IMS, JEC, EBN

### 815 **Acknowledgements**

816 This work was supported by the Wellcome Trust [098051 and 206194]. The authors would like  
817 to thank Robert Kelsh for sharing the *sox10<sup>t3</sup>* and *sox10<sup>baz1</sup>* mutants and Claudia Linker for the  
818 *sox10:mg* transgenic line. The authors would also like to thank Rob Cornell and lab for  
819 discussions about the project along the way. We are grateful to all current and past Vertebrate  
820 Genetics and Genomics group members for advice and help, and Catherine Scahill and Nicole  
821 Staudt for manuscript feedback. The authors would also like to thank Nicola Goodwin and the  
822 RSF as well as sequencing pipelines at the Wellcome Sanger Institute for their excellent  
823 support and zebrafish care.

824

825 **Table 1 Sequencing data and pairwise comparison gene lists.**

| <b>Figure Location</b> | <b>Data Source</b>                             | <b>FigShare DOI</b>                                                                   |
|------------------------|------------------------------------------------|---------------------------------------------------------------------------------------|
| Figure 1i              | FACS RNA-Seq gene lists                        | <a href="https://doi.org/10.6084/m9.figshare.6106082">10.6084/m9.figshare.6106082</a> |
| Figure 1j              | DeTCT gene lists ( <i>sox10, mitfa, yap1</i> ) | <a href="https://doi.org/10.6084/m9.figshare.6106091">10.6084/m9.figshare.6106091</a> |
| Figure 2d              | DeTCT <i>tfap2a;tfap2c</i> gene lists          | <a href="https://doi.org/10.6084/m9.figshare.6106091">10.6084/m9.figshare.6106091</a> |
| Figure 2d              | UpSet gene subsets & ZFA Enrichment            | <a href="https://doi.org/10.6084/m9.figshare.6170417">10.6084/m9.figshare.6170417</a> |
| Supplemental Figure 2b | RNA-Seq <i>tfap2a;tfap2c</i> gene lists        | <a href="https://doi.org/10.6084/m9.figshare.6106079">10.6084/m9.figshare.6106079</a> |
| Figure 4c              | UpSet gene subset lists                        | <a href="https://doi.org/10.6084/m9.figshare.6170474">10.6084/m9.figshare.6170474</a> |
| Figure 5b-g            | MCL cluster gene lists                         | <a href="https://doi.org/10.6084/m9.figshare.6170651">10.6084/m9.figshare.6170651</a> |

826

827

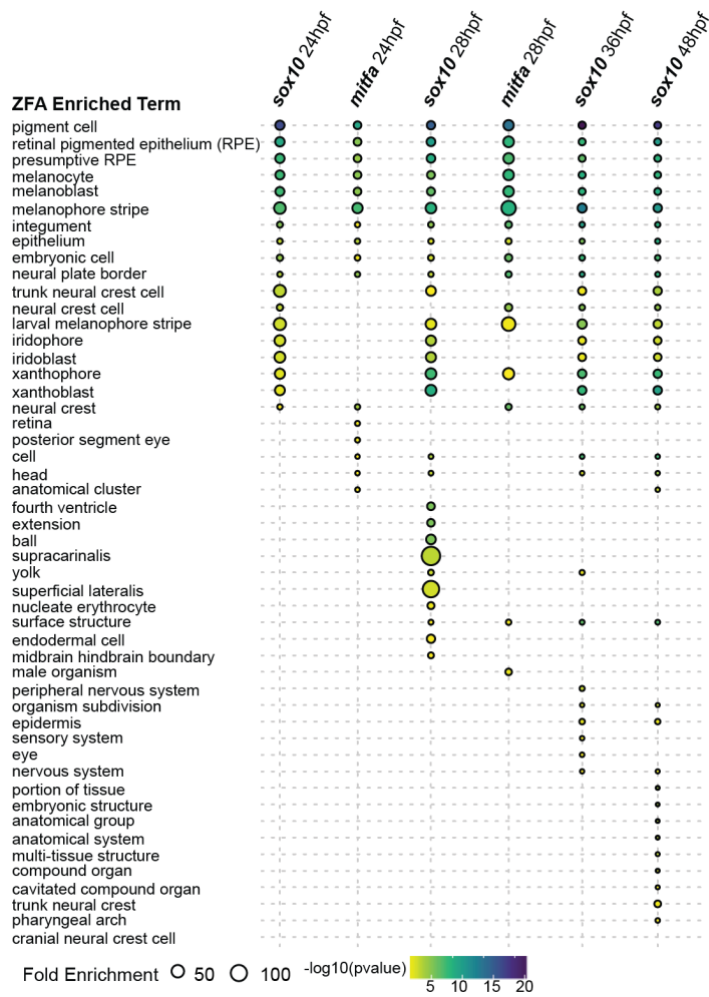

828

829 Supplemental Figure 1

830 Zebrafish anatomy enrichment of *sox10* and *mitfa* mutants across multiple developmental  
831 time points.

832 ZFA enrichment was tested for all *sox10* and *mitfa* mutants compared to wild-type siblings at  
833 all time points shown in Figure 1j but only time points at 24 hpf or later returned significantly  
834 (adj. p-value <0.05) enriched terms.

835

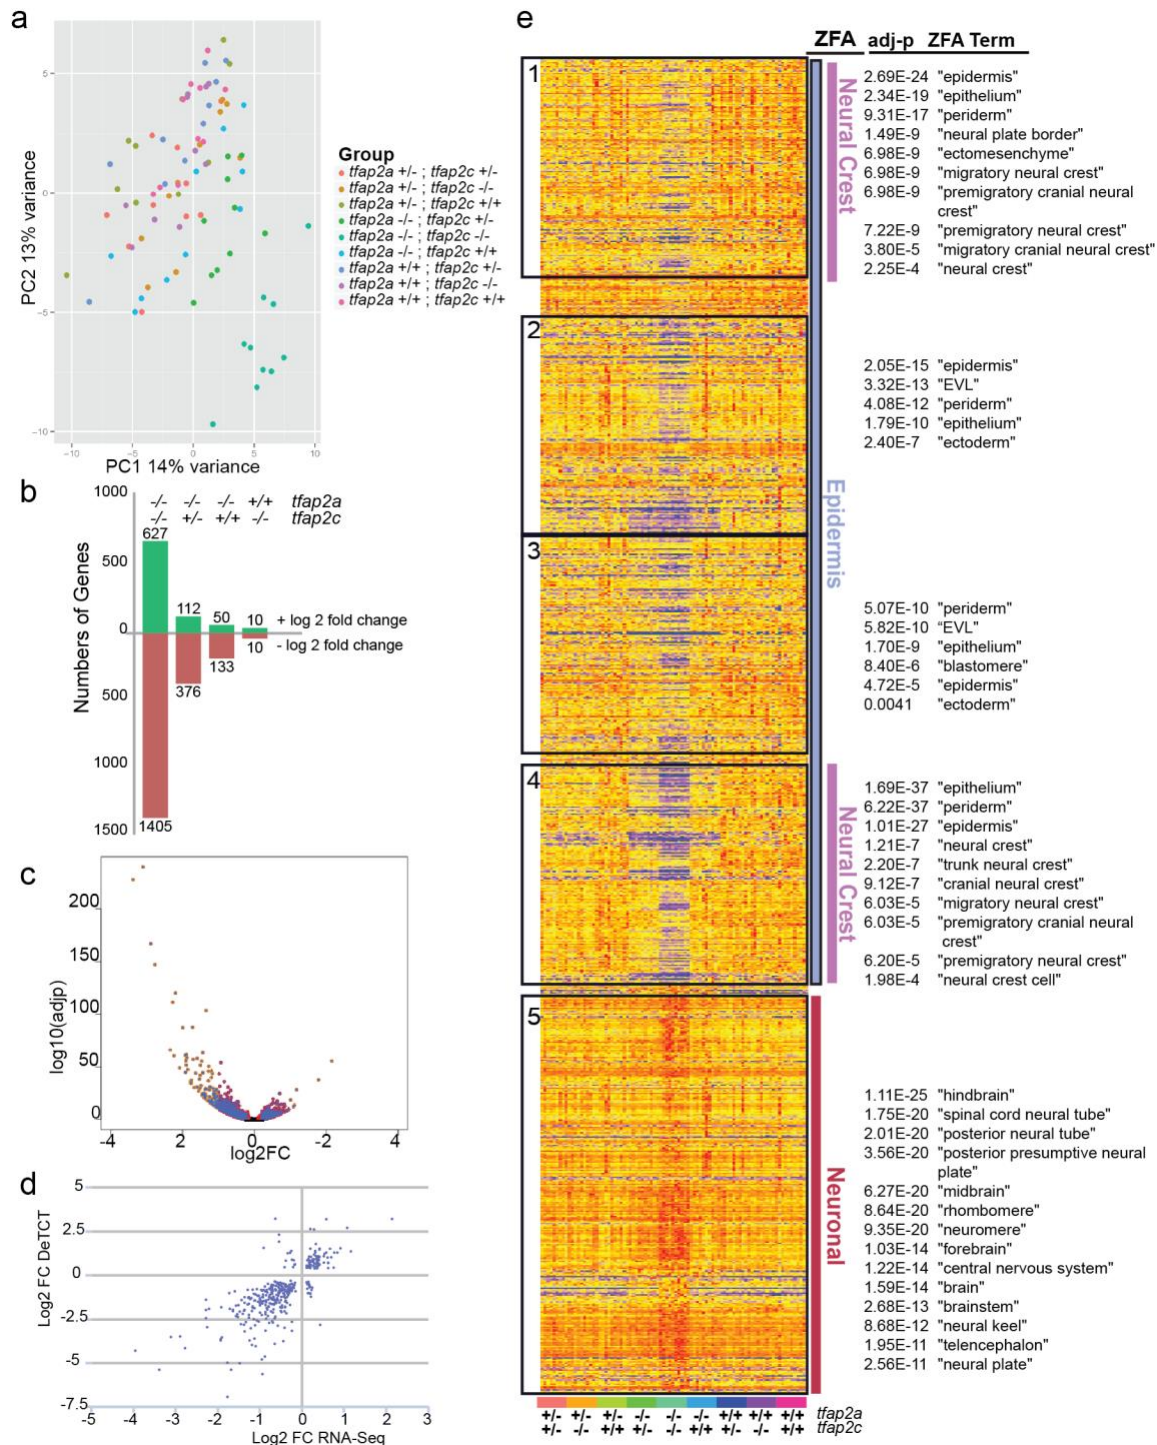

836

837 Supplemental Figure 2

838 RNA-seq transcriptomic analysis of *tfap2a;tfap2c* mutants at 15 somite stage.

839 **a** Principal component analysis of replicates of all 9 *tfap2a;tfap2c* genotypes showing the first  
 840 two principal components. Dots representing a single embryo and genotype denoted by  
 841 colour. **b** Bars denote the numbers of genes for four most relevant pairwise combinations (adj.  
 842 p-value <0.05) with the numbers of genes with a positive log<sub>2</sub> fold change in green and

843 negative in red. The specific genotypes of *tfap2a* and *tfap2c* are listed across the top for each  
844 bar. **c** A pairwise comparison of RNA-seq of *tfap2a*<sup>-/-</sup>;*tfap2c*<sup>-/-</sup> versus their wild-type siblings at  
845 15 somites. The adj p-value on the y axis and the log<sub>2</sub> fold change on the x axis. **d** Comparison  
846 of 3' tag sequencing (y axis) and RNA-Seq (x axis) log<sub>2</sub> fold change of genes with an adj p-  
847 value <0.01 in the *tfap2a*<sup>-/-</sup>;*tfap2c*<sup>-/-</sup> versus wild-type siblings pairwise comparison showing an  
848 overall linear correlation. **e** Heatmap of gene expression with an adj p-value <0.05 from *tfap2a*<sup>-/-</sup>;  
849 *tfap2c*<sup>-/-</sup> to wild-type siblings pairwise comparison. Genes are hierarchically clustered with  
850 the samples organised by genotype. The heatmap was broken into five blocks shown in black  
851 boxes and ZFA enrichment was carried out on those blocks. ZFA enrichments with their  
852 corresponding significances are depicted on the right. ZFA terms were further broadly  
853 categorised into epidermis, neural crest and neuronal.

854

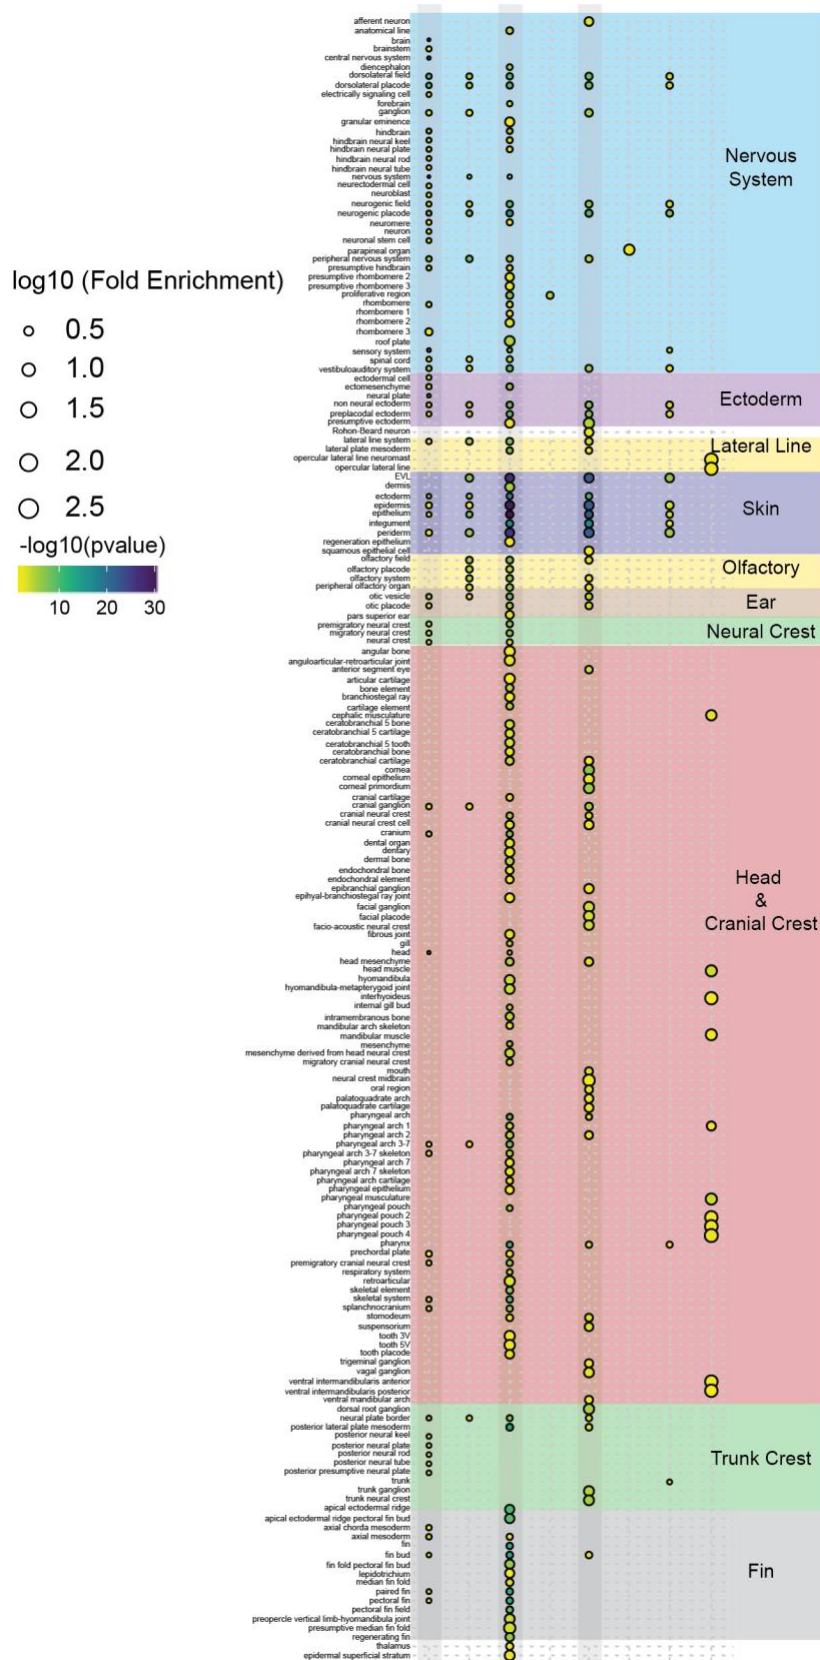

855

856 Supplemental Figure 3

857 Enlargement of zebrafish anatomy enrichment from Figure 4h.

858

859

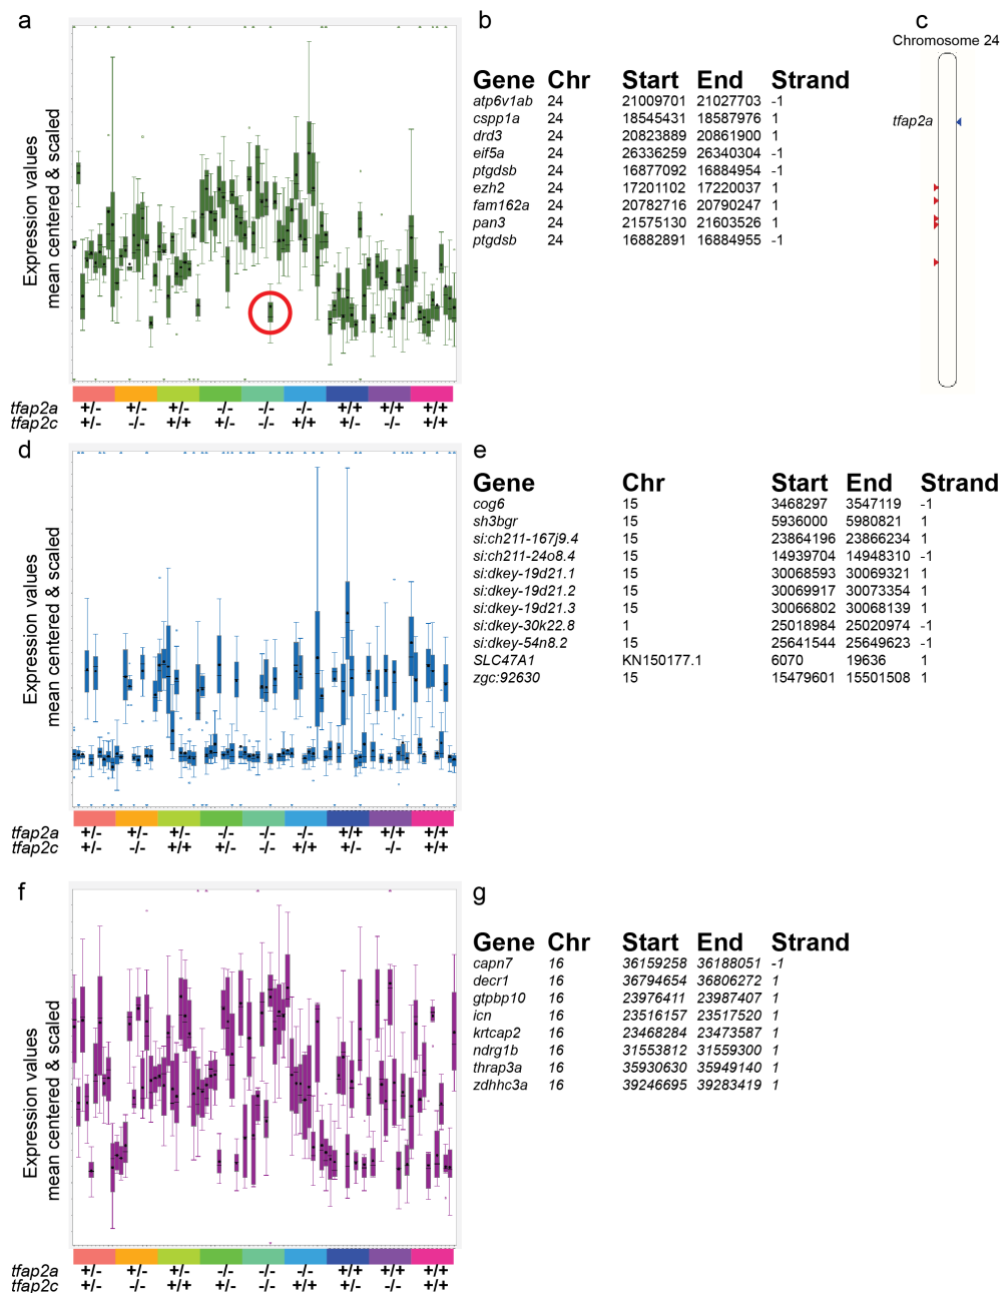

860

861 Supplemental Figure 4

862 Examples of haplotype specific signals from the *tfap2a;tfap2c* 15 somite RNA-Seq data set.

863 **a, d, f** Markov clusters from BioLayout3D expression analysis shown in Figure 5 a' which  
 864 contain genes linked to a specific region on a particular chromosome. A bar indicating the  
 865 genotypes of the embryos is at the bottom. **a** A cluster of genes located on chromosome 24  
 866 linked to *tfap2a*. Genes behave in three groups depending on whether *tfap2a* is  
 867 heterozygous, homozygous or wild-type. A recombination has occurred in one embryo in the  
 868 *tfap2a* homozygous group and that cluster of genes now behaves as the wild-type condition.  
 869 **b** A list of genes and their chromosomal positions which make up the cluster in **a**. **c** A  
 870 karyotype map of chromosome 24 showing the location of *tfap2a* (blue arrow head right) and

871 the positions of the genes contained in the cluster (red arrow heads left). **d** A cluster of  
872 genes on chromosome 15 where genes fall into two different groups, indicating one of the  
873 parents would have been heterozygous for the region. **e** A list of the genes contained in the  
874 cluster which are mostly on chromosome 15 and potentially two incorrectly mapped genes. **f-**  
875 **g** A third example of a haplotype specific region located on chromosome 16 where both  
876 parents are presumably heterozygous for the region leading to three different groups.

**a**

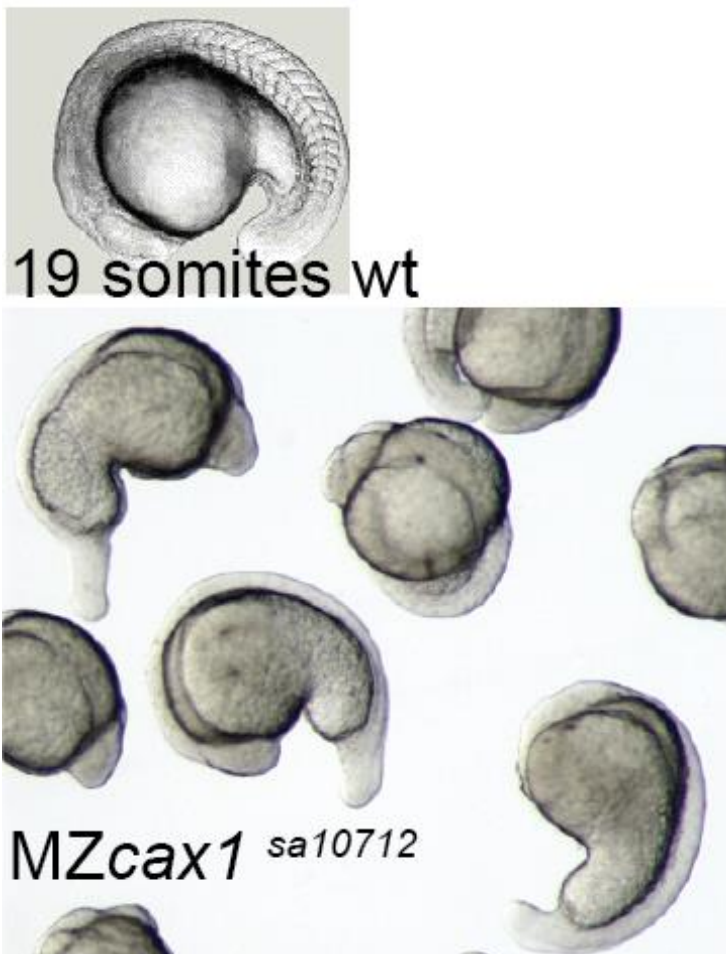

877

878 Supplemental Figure 5

879 *MZcax1*<sup>sa10712</sup> phenotype at 19 somites stage.

880

881



## 882 **References**

- 883 1. Gans C, Northcutt RG. Neural Crest and the Origin of Vertebrates: A New Head. *Science*.  
884 1983;220:268–73.
- 885 2. Hall BK. The neural crest and neural crest cells in vertebrate development and evolution.  
886 2nd ed. New York: Springer; 2009.
- 887 3. Le Douarin N, Kalcheim C. The neural crest. 2. ed., digitally printed version. Cambridge:  
888 Cambridge Univ. Press; 2009.
- 889 4. Meulemans D, Bronner-Fraser M. Gene-Regulatory Interactions in Neural Crest Evolution  
890 and Development. *Dev Cell*. 2004;7:291–9.
- 891 5. Sauka-Spengler T, Meulemans D, Jones M, Bronner-Fraser M. Ancient Evolutionary Origin  
892 of the Neural Crest Gene Regulatory Network. *Dev Cell*. 2007;13:405–20.
- 893 6. Barlow AJ, Dixon J, Dixon MJ, Trainor PA. Balancing neural crest cell intrinsic processes  
894 with those of the microenvironment in Tcof1 haploinsufficient mice enables complete enteric  
895 nervous system formation. *Hum Mol Genet*. 2012;21:1782–93.
- 896 7. Green SA, Simoes-Costa M, Bronner ME. Evolution of vertebrates as viewed from the crest.  
897 *Nature*. 2015;520:474–82.
- 898 8. Simoes-Costa M, Bronner ME. Establishing neural crest identity: a gene regulatory recipe.  
899 *Development*. 2015;142:242–57.
- 900 9. Schorle H, Meier P, Buchert M, Jaenisch R, Mitchell PJ. Transcription factor AP-2 essential  
901 for cranial closure and craniofacial development. *Nature*. 1996;381:235–8.
- 902 10. Milunsky JM, Maher TA, Zhao G, Roberts AE, Stalker HJ, Zori RT, et al. TFAP2A Mutations  
903 Result in Branchio-Oculo-Facial Syndrome. *Am J Hum Genet*. 2008;82:1171–7.
- 904 11. Holzschuh J. Noradrenergic neurons in the zebrafish hindbrain are induced by retinoic  
905 acid and require tfap2a for expression of the neurotransmitter phenotype. *Development*.  
906 2003;130:5741–54.
- 907 12. Knight RD, Javidan Y, Nelson S, Zhang T, Schilling T. Skeletal and pigment cell defects  
908 in the lockjaw mutant reveal multiple roles for zebrafish tfap2a in neural crest development.  
909 *Dev Dyn Off Publ Am Assoc Anat*. 2004;229:87–98.
- 910 13. Barrallo-Gimeno A, Holzschuh J, Driever W, Knapik EW. Neural crest survival and  
911 differentiation in zebrafish depends on mont blanc/tfap2a gene function. *Dev Camb Engl*.  
912 2004;131:1463–77.
- 913 14. Knight RD, Nair S, Nelson SS, Afshar A, Javidan Y, Geisler R, et al. lockjaw encodes a  
914 zebrafish tfap2a required for early neural crest development. *Dev Camb Engl*.  
915 2003;130:5755–68.
- 916 15. Li W, Cornell RA. Redundant activities of Tfap2a and Tfap2c are required for neural crest  
917 induction and development of other non-neural ectoderm derivatives in zebrafish embryos.  
918 *Dev Biol*. 2007;304:338–54.

- 919 16. O'Brien EK, d'Alençon C, Bonde G, Li W, Schoenebeck J, Allende ML, et al. Transcription  
920 factor Ap-2alpha is necessary for development of embryonic melanophores, autonomic  
921 neurons and pharyngeal skeleton in zebrafish. *Dev Biol.* 2004;265:246–61.
- 922 17. Van Otterloo E, Li W, Bonde G, Day KM, Hsu M-Y, Cornell RA. Differentiation of zebrafish  
923 melanophores depends on transcription factors AP2 alpha and AP2 epsilon. *PLoS Genet.*  
924 2010;6:e1001122.
- 925 18. Van Otterloo E, Li W, Garnett A, Cattell M, Medeiros DM, Cornell RA. Novel Tfp2-  
926 mediated control of soxE expression facilitated the evolutionary emergence of the neural crest.  
927 *Dev Camb Engl.* 2012;139:720–30.
- 928 19. Hilger-Eversheim K, Moser M, Schorle H, Buettner R. Regulatory roles of AP-2  
929 transcription factors in vertebrate development, apoptosis and cell-cycle control. *Gene.*  
930 2000;260:1–12.
- 931 20. Uhlen M, Zhang C, Lee S, Sjöstedt E, Fagerberg L, Bidkhorji G, et al. A pathology atlas of  
932 the human cancer transcriptome. *Science.* 2017;357:eaan2507.
- 933 21. Pingault V, Bondurand N, Kuhlbrodt K, Goerich DE, Préhu M-O, Puliti A, et al. SOX10  
934 mutations in patients with Waardenburg-Hirschsprung disease. *Nat Genet.* 1998;18:171–3.
- 935 22. Waardenburg PJ. A new syndrome combining developmental anomalies of the eyelids,  
936 eyebrows and nose root with pigmentary defects of the iris and head hair and with congenital  
937 deafness. *Am J Hum Genet.* 1951;3:195–253.
- 938 23. Southard-Smith EM, Kos L, Pavan WJ. SOX10 mutation disrupts neural crest development  
939 in Dom Hirschsprung mouse model. *Nat Genet.* 1998;18:60–4.
- 940 24. Britsch S. The transcription factor Sox10 is a key regulator of peripheral glial development.  
941 *Genes Dev.* 2001;15:66–78.
- 942 25. Dutton KA, Pauliny A, Lopes SS, Elworthy S, Carney TJ, Rauch J, et al. Zebrafish  
943 colourless encodes sox10 and specifies non-ectomesenchymal neural crest fates. *Dev Camb*  
944 *Engl.* 2001;128:4113–25.
- 945 27. Dooley CM, Mongera A, Walderich B, Nüsslein-Volhard C. On the embryonic origin of  
946 adult melanophores: the role of ErbB and Kit signalling in establishing melanophore stem cells  
947 in zebrafish. *Dev Camb Engl.* 2013;140:1003–13.
- 948 28. Herbarth B, Pingault V, Bondurand N, Kuhlbrodt K, Hermans-Borgmeyer I, Puliti A, et al.  
949 Mutation of the Sry-related Sox10 gene in Dominant megacolon, a mouse model for human  
950 Hirschsprung disease. *Proc Natl Acad Sci U S A.* 1998;95:5161–5.
- 951 29. Kuhlbrodt K, Herbarth B, Sock E, Hermans-Borgmeyer I, Wegner M. Sox10, a novel  
952 transcriptional modulator in glial cells. *J Neurosci Off J Soc Neurosci.* 1998;18:237–50.
- 953 30. Pusch C, Hustert E, Pfeifer D, Südbeck P, Kist R, Roe B, et al. The SOX10/Sox10 gene  
954 from human and mouse: sequence, expression, and transactivation by the encoded HMG  
955 domain transcription factor. *Hum Genet.* 1998;103:115–23.
- 956 31. Kelsh RN, Brand M, Jiang YJ, Heisenberg CP, Lin S, Haffter P, et al. Zebrafish  
957 pigmentation mutations and the processes of neural crest development. *Dev Camb Engl.*  
958 1996;123:369–89.

- 959 32. Carney TJ, Dutton KA, Greenhill E, Delfino-Machin M, Dufourcq P, Blader P, et al. A direct  
960 role for Sox10 in specification of neural crest-derived sensory neurons. *Development*.  
961 2006;133:4619–30.
- 962 33. Cheung M, Briscoe J. Neural crest development is regulated by the transcription factor  
963 Sox9. *Dev Camb Engl*. 2003;130:5681–93.
- 964 34. Yan Y-L, Willoughby J, Liu D, Crump JG, Wilson C, Miller CT, et al. A pair of Sox: distinct  
965 and overlapping functions of zebrafish sox9 co-orthologs in craniofacial and pectoral fin  
966 development. *Dev Camb Engl*. 2005;132:1069–83.
- 967 35. Harris ML, Buac K, Shakhova O, Hakami RM, Wegner M, Sommer L, et al. A dual role for  
968 SOX10 in the maintenance of the postnatal melanocyte lineage and the differentiation of  
969 melanocyte stem cell progenitors. *PLoS Genet*. 2013;9:e1003644.
- 970 36. Baggiolini A, Varum S, Mateos JM, Bettosini D, John N, Bonalli M, et al. Premigratory and  
971 Migratory Neural Crest Cells Are Multipotent In Vivo. *Cell Stem Cell*. 2015;16:314–22.
- 972 37. Strub T, Giuliano S, Ye T, Bonet C, Keime C, Kobi D, et al. Essential role of microphthalmia  
973 transcription factor for DNA replication, mitosis and genomic stability in melanoma. *Oncogene*.  
974 2011;30:2319–32.
- 975 38. Shakhova O, Zingg D, Schaefer SM, Hari L, Civenni G, Blunski J, et al. Sox10 promotes  
976 the formation and maintenance of giant congenital naevi and melanoma. *Nat Cell Biol*.  
977 2012;14:882–90.
- 978 39. Kaufman CK, Mosimann C, Fan ZP, Yang S, Thomas AJ, Ablain J, et al. A zebrafish  
979 melanoma model reveals emergence of neural crest identity during melanoma initiation.  
980 *Science*. 2016;351:aad2197–aad2197.
- 981 40. Rada-Iglesias A, Bajpai R, Prescott S, Brugmann SA, Swigut T, Wysocka J. Epigenomic  
982 Annotation of Enhancers Predicts Transcriptional Regulators of Human Neural Crest. *Cell*  
983 *Stem Cell*. 2012;11:633–48.
- 984 41. Kettleborough RNW, Busch-Nentwich EM, Harvey SA, Dooley CM, de Bruijn E, van Eeden  
985 F, et al. A systematic genome-wide analysis of zebrafish protein-coding gene function. *Nature*.  
986 2013;496:494–7.
- 987 42. Dooley CM, Scahill C, Fényes F, Kettleborough RNW, Stemple DL, Busch-Nentwich EM.  
988 Multi-allelic phenotyping--a systematic approach for the simultaneous analysis of multiple  
989 induced mutations. *Methods San Diego Calif*. 2013;62:197–206.
- 990 43. Brocal I, White R, Dooley C, Carruthers S, Clark R, Hall A, et al. Efficient identification of  
991 CRISPR/Cas9-induced insertions/deletions by direct germline screening in zebrafish.
- 992 44. White RJ, Collins JE, Sealy IM, Wali N, Dooley CM, Digby Z, et al. A high-resolution mRNA  
993 expression time course of embryonic development in zebrafish. *eLife*. 2017;6.
- 994 45. Newport J, Kirschner M. A major developmental transition in early *Xenopus* embryos: II.  
995 Control of the onset of transcription. *Cell*. 1982;30:687–96.
- 996 46. Schier AF. The Maternal-Zygotic Transition: Death and Birth of RNAs. *Science*.  
997 2007;316:406–7.

- 998 47. Tadros W, Lipshitz HD. The maternal-to-zygotic transition: a play in two acts.  
999 Development. 2009;136:3033–42.
- 1000 48. Thisse B, Thisse C. Fast Release Clones: A High Throughput Expression Analysis. ZFIN  
1001 Direct Data Submission. [Internet]. ZFIN; 2004. Available from: <http://zfin.org>
- 1002 49. Richardson J, Gauert A, Briones Montecinos L, Fanlo L, Alhashem ZM, Assar R, et al.  
1003 Leader Cells Define Directionality of Trunk, but Not Cranial, Neural Crest Cell Migration. Cell  
1004 Rep. 2016;15:2076–88.
- 1005 50. Lister JA, Robertson CP, Lepage T, Johnson SL, Raible DW. nacre encodes a zebrafish  
1006 microphthalmia-related protein that regulates neural-crest-derived pigment cell fate. Dev  
1007 Camb Engl. 1999;126:3757–67.
- 1008 51. Collins JE, Wali N, Sealy IM, Morris JA, White RJ, Leonard SR, et al. High-throughput and  
1009 quantitative genome-wide messenger RNA sequencing for molecular phenotyping. BMC  
1010 Genomics [Internet]. 2015 [cited 2015 Sep 11];16. Available from:  
1011 <http://www.biomedcentral.com/1471-2164/16/578>
- 1012 52. Leask A, Byrne C, Fuchs E. Transcription factor AP2 and its role in epidermal-specific  
1013 gene expression. Proc Natl Acad Sci U S A. 1991;88:7948–52.
- 1014 53. Lex A, Gehlenborg N, Strobel H, Vuillemot R, Pfister H. UpSet: Visualization of  
1015 Intersecting Sets. IEEE Trans Vis Comput Graph. 2014;20:1983–92.
- 1016 54. Wittkopp N, Huntzinger E, Weiler C, Saulière J, Schmidt S, Sonawane M, et al. Nonsense-  
1017 mediated mRNA decay effectors are essential for zebrafish embryonic development and  
1018 survival. Mol Cell Biol. 2009;29:3517–28.
- 1019 55. Enright AJ, Ouzounis CA. BioLayout--an automatic graph layout algorithm for similarity  
1020 visualization. Bioinforma Oxf Engl. 2001;17:853–4.
- 1021 56. Theocharidis A, van Dongen S, Enright AJ, Freeman TC. Network visualization and  
1022 analysis of gene expression data using BioLayout Express(3D). Nat Protoc. 2009;4:1535–50.
- 1023 57. GTEx Consortium, Laboratory, Data Analysis & Coordinating Center (LDACC)—Analysis  
1024 Working Group, Statistical Methods groups—Analysis Working Group, Enhancing GTEx  
1025 (eGTEx) groups, NIH Common Fund, NIH/NCI, et al. Genetic effects on gene expression  
1026 across human tissues. Nature. 2017;550:204–13.
- 1027 58. Li X, Kim Y, Tsang EK, Davis JR, Damani FN, Chiang C, et al. The impact of rare variation  
1028 on gene expression across tissues. Nature. 2017;550:239–43.
- 1029 59. Miesfeld JB, Gestri G, Clark BS, Flinn MA, Poole RJ, Bader JR, et al. Yap and Taz regulate  
1030 retinal pigment epithelial cell fate. Dev Camb Engl. 2015;142:3021–32.
- 1031 60. Agarwala S, Duquesne S, Liu K, Boehm A, Grimm L, Link S, et al. Amotl2a interacts with  
1032 the Hippo effector Yap1 and the Wnt/ $\beta$ -catenin effector Lef1 to control tissue size in zebrafish.  
1033 eLife. 2015;4:e08201.
- 1034 61. Kimelman D, Smith NL, Lai JKH, Stainier DY. Regulation of posterior body and epidermal  
1035 morphogenesis in zebrafish by localized Yap1 and Wwtr1. eLife. 2017;6.
- 1036 62. Porazinski S, Wang H, Asaoka Y, Behrndt M, Miyamoto T, Morita H, et al. YAP is essential  
1037 for tissue tension to ensure vertebrate 3D body shape. Nature. 2015;521:217–21.

- 1038 63. Trinh LA, Chong-Morrison V, Gavriouchkina D, Hochgreb-Hägele T, Senanayake U,  
1039 Fraser SE, et al. Biotagging of Specific Cell Populations in Zebrafish Reveals Gene Regulatory  
1040 Logic Encoded in the Nuclear Transcriptome. *Cell Rep.* 2017;19:425–40.
- 1041 64. Arduini BL, Bosse KM, Henion PD. Genetic ablation of neural crest cell diversification.  
1042 *Development.* 2009;136:1987–94.
- 1043 65. Wang W-D, Melville DB, Montero-Balaguer M, Hatzopoulos AK, Knapik EW. Tfp2a and  
1044 Foxd3 regulate early steps in the development of the neural crest progenitor population. *Dev*  
1045 *Biol.* 2011;360:173–85.
- 1046 66. Buitrago-Delgado E, Nordin K, Rao A, Geary L, LaBonne C. Shared regulatory programs  
1047 suggest retention of blastula-stage potential in neural crest cells. *Science.* 2015;348:1332–5.
- 1048 67. Gavriouchkina D, Williams RM, Lukoseviciute M, Hochgreb-Hägele T, Senanayake U,  
1049 Chong-Morrison V, et al. From pioneer to repressor: Bimodal foxd3 activity dynamically  
1050 remodels neural crest regulatory landscape in vivo. 2017;
- 1051 68. Williams T, Tjian R. Analysis of the DNA-binding and activation properties of the human  
1052 transcription factor AP-2. *Genes Dev.* 1991;5:670–82.
- 1053 69. Pingault V, Ente D, Dastot-Le Moal F, Goossens M, Marlin S, Bondurand N. Review and  
1054 update of mutations causing Waardenburg syndrome. *Hum Mutat.* 2010;31:391–406.
- 1055 70. Kok FO, Shin M, Ni C-W, Gupta A, Grosse AS, van Impel A, et al. Reverse genetic  
1056 screening reveals poor correlation between morpholino-induced and mutant phenotypes in  
1057 zebrafish. *Dev Cell.* 2015;32:97–108.
- 1058 71. Sanders LH, Whitlock KE. Phenotype of the zebrafish masterblind (mbl) mutant is  
1059 dependent on genetic background. *Dev Dyn Off Publ Am Assoc Anat.* 2003;227:291–300.
- 1060 72. Manderfield LJ, Engleka KA, Aghajanian H, Gupta M, Yang S, Li L, et al. Pax3 and Hippo  
1061 Signaling Coordinate Melanocyte Gene Expression in Neural Crest. *Cell Rep.* 2014;9:1885–  
1062 95.
- 1063 73. Hindley CJ, Condurat AL, Menon V, Thomas R, Azmitia LM, Davis JA, et al. The Hippo  
1064 pathway member YAP enhances human neural crest cell fate and migration. *Sci Rep*  
1065 *[Internet].* 2016 [cited 2017 Sep 13];6. Available from:  
1066 <http://www.nature.com/articles/srep23208>
- 1067 74. Wang J, Xiao Y, Hsu C-W, Martinez-Traverso IM, Zhang M, Bai Y, et al. Yap and Taz play  
1068 a crucial role in neural crest-derived craniofacial development. *Development.* 2016;143:504–  
1069 15.
- 1070 75. Adameyko I, Lallemand F, Aquino JB, Pereira JA, Topilko P, Müller T, et al. Schwann Cell  
1071 Precursors from Nerve Innervation Are a Cellular Origin of Melanocytes in Skin. *Cell.*  
1072 2009;139:366–79.
- 1073 76. Budi EH, Patterson LB, Parichy DM. Post-Embryonic Nerve-Associated Precursors to  
1074 Adult Pigment Cells: Genetic Requirements and Dynamics of Morphogenesis and  
1075 Differentiation. Barsh GS, editor. *PLoS Genet.* 2011;7:e1002044.
- 1076 77. M Westerfield. *The Zebrafish Book: A Guide for Laboratory Use of Zebrafish (Danio Rerio)*  
1077 - See more at: <http://elifesciences.org/content/5/e11813#ref-80>. 4th ed. Eugene, USA:  
1078 University of Oregon Press; 2000.

1079 78. Jao L-E, Wente SR, Chen W. Efficient multiplex biallelic zebrafish genome editing using a  
1080 CRISPR nuclease system. Proc Natl Acad Sci. 2013;110:13904–9.

1081
